# Supplementary material for: A novel therapeutic approach for endometriosis using adipose-derived stem cell-derived conditioned medium- A new hope for endometriotic patients in improving fertility
Source: Front Endocrinol (Lausanne). 2023 May 24;14:1158527. doi: 10.3389/fendo.2023.1158527 (PMC10244723; doi:10.3389/fendo.2023.1158527)
Supplement: Supplementary file 4 [file Table_4.xlsx]

## Sheet: Sheet0
© 2000-2023 QIAGEN. All rights reserved.
Categories	Diseases or Functions Annotation	p-value	Molecules	# Molecules
Liver Hyperplasia/Hyperproliferation	Liver tumor	3.69e-42	A1BG,A2M,ABI3BP,ACAA2,ACBD3,ACE,ACLY,ACO1,ACTA1,ACTB,ACTN1,ACTN4,ACTR2,ACTR3,ACY1,ADAM10,ADAM12,ADAM17,ADAM9,ADAMTS1,ADAMTS12,ADAMTS2,ADAMTSL1,ADH5,ADIPOQ,AEBP1,AGRN,AGT,AHNAK,AHSG,AK2,AKR1C1/AKR1C2,AKR1C3,ALAD,ALB,ALCAM,ALDOA,AMBP,ANG,ANP32B,ANP32E,ANPEP,ANXA1,ANXA5,AP1G1,AP1M1,AP2A2,AP3D1,APCS,APEX1,API5,APOA1,APOA2,APOB,APOE,APOL1,APP,ARHGDIA,ARPC1A,ARPC5,ASAH1,ASPH,ATIC,ATP5F1A,ATP5F1B,ATRN,A…	681
Liver Hyperplasia/Hyperproliferation	Liver cancer	6.25e-35	A1BG,ABI3BP,ACAA2,ACBD3,ACE,ACLY,ACO1,ACTB,ACTN1,ACTN4,ACTR3,ACY1,ADAM10,ADAM12,ADAM17,ADAM9,ADAMTS1,ADAMTS12,ADAMTS2,ADAMTSL1,ADH5,AEBP1,AGRN,AGT,AHNAK,AHSG,AK2,AKR1C1/AKR1C2,ALAD,ALB,ALCAM,ALDOA,AMBP,ANG,ANP32B,ANP32E,ANPEP,ANXA1,ANXA5,AP1G1,AP1M1,AP2A2,AP3D1,APCS,APEX1,API5,APOA1,APOA2,APOB,APOE,APOL1,ARHGDIA,ARPC1A,ARPC5,ASAH1,ASPH,ATIC,ATP5F1A,ATP5F1B,ATRN,AXL,B2M,B4GALT1,BCAT1,BCHE,BLVRA,BM…	596
Hepatocellular carcinoma,Liver Hyperplasia/Hyperproliferation	Hepatocellular carcinoma	6.59e-31	ACLY,ACY1,ADAM10,ADAM12,ADAM17,ADAM9,ADAMTS1,ADAMTS12,ADH5,AGT,AHNAK,AK2,AKR1C1/AKR1C2,ALAD,ALB,ALDOA,ANXA1,ANXA5,AP1G1,APOA1,APOB,ARPC5,ASPH,AXL,BSG,C7,C9,CA12,CALU,CAT,CCDC80,CCN1,CCN2,CCN5,CD109,CD44,CD5L,CDH2,CFP,CLIC1,CNPY2,COL11A1,COL15A1,COL4A1,COL4A2,COL5A1,COL5A2,COPG1,CP,CPN1,CS,CSE1L,CSF1,CTNNA1,CTNNB1,CTSB,CTSD,CTTN,CXCL12,DBN1,DCN,DHX9,DLD,DNASE2,DPP3,DPT,EEF1A1,EEF2,EGFR,EHD2,EHD3,E…	265
Liver Hyperplasia/Hyperproliferation	Liver carcinoma	1.91e-30	ABI3BP,ACAA2,ACBD3,ACE,ACLY,ACO1,ACTB,ACTN1,ACTR3,ACY1,ADAM10,ADAM12,ADAM17,ADAM9,ADAMTS1,ADAMTS12,ADAMTS2,ADAMTSL1,ADH5,AEBP1,AGRN,AGT,AHNAK,AK2,AKR1C1/AKR1C2,ALAD,ALB,ALCAM,ALDOA,ANP32B,ANP32E,ANPEP,ANXA1,ANXA5,AP1G1,AP1M1,AP2A2,AP3D1,APCS,APEX1,API5,APOA1,APOB,APOE,APOL1,ARHGDIA,ARPC1A,ARPC5,ASAH1,ASPH,ATIC,ATP5F1A,ATP5F1B,ATRN,AXL,B2M,BCAT1,BCHE,BLVRA,BPNT1,BSG,C1R,C1S,C3,C5,C7,C9,CA12,CAB39L…	565
Hepatocellular carcinoma,Liver Hyperplasia/Hyperproliferation	Hepatitis B virus-related hepatocellular carcinoma	6.46e-21	ACLY,ALDOA,ANXA5,CAT,CLIC1,CS,CTNNA1,CTNNB1,EEF2,EIF4B,ENO1,FAH,FASN,FGB,HNRNPK,HSD17B4,HSP90B1,HSPA4,HSPA5,HSPA8,HSPA9,HSPD1,LAMB1,LDHA,NME1,NPM1,PEBP1,PGAM1,PGK1,PKM,RACK1,RPSA,RRBP1,SOD1,TF,TGFB1,TUBB,VCP,VIM	39
Hepatocellular carcinoma,Liver Hyperplasia/Hyperproliferation	Hepatitis B surface antigen-negative hepatitis C virus negative hepatocellular carcinoma	2.5e-20	CLIC1,CTSB,DLD,EEF2,ENO1,FGB,HSP90B1,HSPA5,HSPA8,HSPA9,HSPD1,NME1,NPM1,PDIA3,PEBP1,RACK1,RBP4,TF,TPM3,VCP,VIM	21
Cardiac Dysfunction	Ventricular dysfunction	9.37e-20	ACE,ACTN2,ADAM17,ADIPOQ,AGT,ANGPTL4,APOA1,APOA2,APOA4,APOB,APOC3,APOD,APOE,APOL1,APOM,BGN,CAPNS1,CAST,CRK,CSF1,CTNNB1,CTSA,DES,DPP4,EGFR,F10,F2,F9,FAS,FHL2,FKBP1A,FSTL3,GAA,GAS6,GLA,HMOX1,IGF2R,IL6,KITLG,LAMA4,LMNA,MDK,MGAT1,MME,MMP1,MMP2,MMP9,MYH11,MYLK3,NT5E,PDLIM5,PLG,POSTN,PPP3CA,PRDX3,PTX3,SERPINC1,SERPINE1,SOD2,TIMP1,TIMP2,TIMP3,TPM1,VCL	64
Renal Damage	Damage of kidney	4.74e-19	ACE,AGT,AHSG,AKR1A1,ALB,AMBP,ANPEP,APOE,ARHGDIA,B2M,C1QA,C3,C4A/C4B,C5,CA12,CAT,CCN1,CD44,CD55,CD59,CD5L,CFB,CFH,CFP,CLU,CSF1,CST3,CTNNB1,DPP3,FAH,FAS,FKBP1A,FN1,GC,GRN,GSS,HGF,HMOX1,HPX,ICAM1,IGF1,IGHM,IL6,ITGB1,LYZ,MBL2,MDK,MIF,MME,NAGLU,PARP1,PKM,PLAUR,RGMB,SERPINA3,SERPINE1,TGFB1,THBS1,THY1,TLN1,YBX1	61
Cardiac Infarction	Myocardial infarction	8.46e-19	ACE,ACTA1,ADIPOQ,AGT,APOA1,APOC3,APOD,APOE,APP,BMP1,C3,C4A/C4B,C5,CA12,CCT7,CD44,CD55,CLU,COL3A1,CREG1,CSF1,CXCL12,F10,F13A1,F2,F9,FGB,FGG,FSTL1,FSTL3,GAA,GLO1,GSS,HGF,HMOX1,IL1RN,IL6,IL6ST,ITGAV,KRT18,KRT8,LDLR,LPA,LRP1,MAPK1,MIF,MME,MMP9,MYDGF,NNMT,NT5E,PARP1,PCSK9,PLG,PON1,POSTN,PPIA,PPIF,PPP3CA,PSMA6,PTX3,SERPINC1,SERPINE1,SERPINF2,SOD1,TF,TUBA1C,TUBB,TUBB3,VWF	70
Cardiac Dysfunction	Dysfunction of heart	1.93e-18	ACE,ACTN2,ADAM17,ADIPOQ,AGT,ANGPTL4,APOA1,APOA2,APOA4,APOB,APOC3,APOD,APOE,APOL1,APOM,BGN,CAPNS1,CAST,CRK,CSF1,CTNNB1,CTSA,DES,DPP4,EGFR,ENPP2,F10,F2,F9,FAS,FHL2,FKBP1A,FSTL3,GAA,GAS6,GLA,HMOX1,IGF2R,IL6,ITGA5,KITLG,LAMA4,LMNA,MDK,MGAT1,MME,MMP1,MMP2,MMP9,MYH11,MYLK3,NT5E,PDLIM5,PLG,POSTN,PPP3CA,PRDX3,PTX3,SERPINC1,SERPINE1,SOD2,TGFB1,TIMP1,TIMP2,TIMP3,TPM1,VCL	67
Renal Damage,Renal Tubule Injury	Proximal tubular toxicity	3.1e-17	ALB,COL3A1,COL5A1,CP,FABP3,FASN,FBN1,FGA,FGB,FN1,G6PD,GSR,GSS,GSTP1,HADH,HPX,HSP90AA1,HSPB1,IGF1,IGFBP3,IGFBP5,KNG1,LGALS1,LGALS3,LYZ,PSMA3,S100A10,TIMP1,TMSB10/TMSB4X,TXNRD1,YBX1	31
Cardiac Dysfunction	Left ventricular dysfunction	5.53e-17	ACE,ACTN2,ADAM17,ADIPOQ,AGT,APOA1,APOA2,APOA4,APOB,APOC3,APOD,APOE,APOL1,APOM,BGN,CAPNS1,CRK,CTNNB1,CTSA,DES,DPP4,EGFR,F10,F9,FAS,FHL2,FKBP1A,FSTL3,GAA,GAS6,GLA,HMOX1,IGF2R,IL6,KITLG,LAMA4,LMNA,MDK,MGAT1,MME,MMP1,MMP2,MMP9,MYH11,MYLK3,NT5E,PDLIM5,POSTN,PPP3CA,PRDX3,PTX3,SERPINE1,SOD2,TIMP1,TIMP2,TIMP3,TPM1,VCL	58
Liver Fibrosis	Fibrosis of liver	7.35e-17	AGT,ALB,APOA1,APOA2,APOB,APOE,B2M,BSG,C5,CCL2,CCN2,CHI3L1,COL1A1,COL1A2,COL3A1,CST3,CTNNB1,CTSB,DNASE2,F11,FGG,FHL2,FN1,FST,GLG1,GOLM1,GSTP1,HDGF,HGF,HMOX1,HNRNPK,HP,HPX,HSPB1,IL6,IL6ST,IMPDH2,ITGA5,KRT18,KRT8,LDLR,LGALS1,LGALS3,LRP1,MIF,MMP1,MMP2,MMP9,NAGLU,NAMPT,NT5E,PDGFC,PDGFRB,PKM,PLAUR,PLG,POSTN,PPIA,PPP3CA,PRMT1,RACK1,SERPINA1,SERPINA3,SERPINC1,SERPINE1,SMPD1,SPARC,TF,TGFB1,THY1,TIMP1,TIMP…	75
Renal Damage	Nephrotoxicity	7.44e-17	ALB,COL3A1,COL5A1,CP,FABP3,FASN,FBN1,FGA,FGB,FKBP1A,FN1,G6PD,GSR,GSS,GSTP1,HADH,HPX,HSP90AA1,HSPB1,IGF1,IGFBP3,IGFBP5,KNG1,LGALS1,LGALS3,LYZ,PPP3CA,PSMA3,S100A10,TIMP1,TMSB10/TMSB4X,TXNRD1,YBX1	33
Glomerular Injury	Abnormal morphology of renal glomerulus	9.07e-16	ACE,ACTN4,ADIPOQ,AGA,AGT,ANGPTL4,APOE,APOL1,ARHGDIA,B4GALT1,BSG,C4A/C4B,CD55,CFH,CFI,CLU,COL18A1,COL4A3,CTSK,DPP3,EHD3,FAT1,FBLN1,GAS6,GRN,ITGB1,LAMB2,LAMC1,LGMN,MAN2A1,MYH9,NAGLU,PDGFRB,SERPINE1	34
Cardiac Enlargement	Enlargement of heart	2.75e-14	ACE,ACTN2,ADAM17,ADAMTS2,ADIPOQ,AGT,APOE,BGN,CAPNS1,CAST,CCN2,CDH2,COL3A1,CRK,CTNNB1,CTSB,CTSC,CTSD,CXCL12,DAG1,DES,EEF1D,EGFR,ELN,F10,F11,F9,FABP3,FAM114A1,FASN,FHL2,FKBP1A,FLNC,FN1,FSTL3,FUBP1,GAA,GAS6,GLA,GPX3,GSN,HGF,HMGB1,HMOX1,HPRT1,HUWE1,IDUA,IGF1,IGF2R,IL6,IL6ST,INHBA,ITGAV,LAMA2,LAMA4,LMCD1,LMNA,MAPK1,MDK,MFGE8,MGAT1,MIF,MME,MMP1,MMP10,MMP14,MMP2,MMP9,MYH11,MYH9,MYL9,MYLK3,NT5E,PARK7,PAR…	109
Liver Fibrosis,Liver Proliferation	Proliferation of hepatic stellate cells	1.26e-13	ADIPOQ,AGT,CCN2,CHI3L1,COL1A1,CTSB,CXCL12,ERO1A,F2,HGF,IGF1,IL6,IL6ST,ITGAV,ITGB1,LGALS1,LGALS3,MMP14,SERPINH1,SMPD1,TF,TGFB1,TIMP1,TIMP2	24
Liver Necrosis/Cell Death	Cell death of liver	2.98e-13	ADIPOQ,AGA,API5,APOE,APP,C3,CASP6,CAT,CFH,CTH,CTNNB1,CTSB,EGFR,F11,FAH,FAS,FASN,FGA,FKBP1A,FLNA,GOT2,GSN,HDGF,HGF,HMGB1,HMOX1,HNRNPU,HSPD1,IGF1,IL1RN,IL6,IL6ST,INHBA,ITGAV,ITIH4,KRT18,KRT8,LDLR,LGALS3,LRP1,MANF,MME,MMP9,NAMPT,NCL,PLG,PROS1,SELENOP,SERPINA3,SERPINE1,SERPINH1,SMPD1,SOD1,SOD2,SPTBN1,TGFB1,TIMP1,TIMP3,TKT,VASN	60
Liver Proliferation	Proliferation of liver cells	4.07e-13	ADIPOQ,AGT,C3,C5,CCN1,CCN2,CHI3L1,COL1A1,CTNNB1,CTSB,CUL3,CXCL12,DDB1,EGFR,ERO1A,F2,FAH,FAS,FGF7,FST,HGF,IGF1,IL1RN,IL6,IL6ST,INHBA,ITGAV,ITGB1,ITIH4,KITLG,LGALS1,LGALS3,MAPK1,MDK,MMP14,PIK3IP1,PLG,PTN,RTN4,SERPINH1,SMPD1,SPTBN1,SULF2,TF,TGFB1,THBS1,TIMP1,TIMP2	48
Renal Damage	Injury of kidney	5.07e-13	AGT,AHSG,AKR1A1,ALB,AMBP,ANPEP,ARHGDIA,B2M,C3,C5,CA12,CAT,CCN1,CD44,CD55,CD59,CD5L,CFB,CFH,CFP,CLU,CST3,CTNNB1,DPP3,FKBP1A,GRN,GSS,HGF,HMOX1,ICAM1,IGF1,IGHM,IL6,LYZ,MBL2,MME,NAGLU,PARP1,PKM,RGMB,SERPINA3,TGFB1,THBS1,TLN1	44
Hepatocellular carcinoma,Liver Hyperplasia/Hyperproliferation	Hepatitis C virus-related hepatocellular carcinoma	7.11e-13	ANXA5,CAT,EEF2,FAH,GC,HSP90B1,HSPA5,HSPA8,HSPA9,HSPD1,LAP3,NME1,NPM1,RRBP1,TUBB,VIM	16
Cardiac Necrosis/Cell Death	Cell death of heart	8.26e-13	ADIPOQ,AGT,APOA1,CALR,CAT,CCN1,CREG1,CTNNB1,DES,DPP4,FAS,FASN,FSTL1,FSTL3,GAPDH,GNB1,GSN,HGF,HK1,HMOX1,HPX,HSPB1,HSPD1,HSPE1,IGF1,IL1RN,IL6,IL6ST,INHBA,KNG1,MANF,MAPK1,MDK,MMP2,MYLK3,NAMPT,NCL,PARK7,PARP1,PLRG1,PPIF,PPP3CA,PRKAR1A,PTN,RPSA,RTN4,S100A6,SERPINF1,SFRP2,SOD2,THBS2,TIMP1,TIMP2,ZYX	54
Cardiac Necrosis/Cell Death	Necrosis of cardiac muscle	1.08e-12	ADIPOQ,AGT,APOA1,CALR,CAT,CCN1,CREG1,DES,DPP4,FAS,FASN,FSTL1,FSTL3,GAPDH,GNB1,GSN,HGF,HK1,HMOX1,HSPB1,HSPD1,HSPE1,IGF1,IL1RN,IL6,IL6ST,INHBA,KNG1,MANF,MAPK1,MDK,MMP2,MYLK3,NAMPT,NCL,PARK7,PARP1,PLRG1,PPIF,PPP3CA,PRKAR1A,PTN,RPSA,RTN4,S100A6,SERPINF1,SFRP2,SOD2,THBS2,TIMP1,TIMP2,ZYX	52
Liver Necrosis/Cell Death	Necrosis of liver	1.5e-12	ADIPOQ,AGA,API5,APOE,C3,CASP6,CAT,CFH,CTH,CTNNB1,CTSB,EGFR,F11,FAH,FAS,FASN,FGA,FKBP1A,FLNA,GOT2,GSN,HDGF,HGF,HMGB1,HMOX1,HNRNPU,HSPD1,IGF1,IL1RN,IL6,IL6ST,INHBA,ITGAV,ITIH4,KRT18,KRT8,LDLR,LGALS3,LRP1,MANF,MME,MMP9,NAMPT,NCL,PLG,PROS1,SELENOP,SERPINA3,SERPINE1,SERPINH1,SMPD1,SOD1,SOD2,SPTBN1,TGFB1,TIMP1,TIMP3,VASN	58
Cardiac Enlargement	Hypertrophy of heart	2.75e-12	ACE,ADAM17,ADAMTS2,ADIPOQ,AGT,APOE,CCN2,CTNNB1,CTSB,CTSC,CTSD,CXCL12,DES,EEF1D,EGFR,ELN,FABP3,FAM114A1,FASN,FHL2,FKBP1A,FN1,FSTL3,FUBP1,GAA,GAS6,GLA,GPX3,GSN,HGF,HMGB1,HMOX1,HPRT1,IGF1,IGF2R,IL6,IL6ST,INHBA,LAMA4,LMCD1,MAPK1,MDK,MFGE8,MIF,MME,MMP1,MMP2,MMP9,MYL9,MYLK3,NT5E,PARK7,PARP1,PDGFC,PFN1,POSTN,PPIA,PPP3CA,RBP4,S100A10,S100A6,SERPINE1,SIRPA,SOD2,SPTAN1,TGFB1,TGFBR3,TIMP1,TIMP3,TLN1,TNFRSF1…	74
Cardiac Dilation,Cardiac Dysfunction,Cardiac Enlargement	Left ventricular dilation	2.95e-12	ADAM17,ADIPOQ,APOE,BGN,CAPNS1,CRK,DES,FKBP1A,FSTL3,GAA,IGF2R,IL6,LAMA4,LMNA,MGAT1,MMP2,MMP9,MYH11,PDLIM5,SERPINE1,SOD2,TIMP1,TIMP3,VCL	24
Liver Fibrosis	Activation of hepatic stellate cells	3.7e-12	ADIPOQ,AGT,CHI3L1,CXCL12,FMOD,FN1,HGF,IGF1,IL6,IL6ST,ITGAV,ITGB1,LGALS3,LOX,MIF,MMP14,MMP9,PDGFC,PDGFRB,SERPINA4,SERPINH1,SPARC,TGFB1,TIMP1,TIMP2	25
Cardiac Necrosis/Cell Death	Cell death of cardiomyocytes	6.52e-12	ADIPOQ,AGT,APOA1,CALR,CAT,CCN1,CREG1,DPP4,FAS,FASN,FSTL1,FSTL3,GAPDH,GNB1,GSN,HGF,HK1,HMOX1,HSPB1,HSPD1,HSPE1,IGF1,IL1RN,IL6,IL6ST,INHBA,KNG1,MANF,MAPK1,MDK,MMP2,NAMPT,NCL,PARK7,PARP1,PLRG1,PPIF,PPP3CA,PRKAR1A,PTN,RPSA,RTN4,S100A6,SERPINF1,SFRP2,SOD2,THBS2,TIMP1,TIMP2,ZYX	50
Cardiac Necrosis/Cell Death	Cell death of heart cells	6.71e-12	ADIPOQ,AGT,APOA1,CALR,CAT,CCN1,CREG1,CTNNB1,DPP4,FAS,FASN,FSTL1,FSTL3,GAPDH,GNB1,GSN,HGF,HK1,HMOX1,HSPB1,HSPD1,HSPE1,IGF1,IL1RN,IL6,IL6ST,INHBA,KNG1,MANF,MAPK1,MDK,MMP2,NAMPT,NCL,PARK7,PARP1,PLRG1,PPIF,PPP3CA,PRKAR1A,PTN,RPSA,RTN4,S100A6,SERPINF1,SFRP2,SOD2,THBS2,TIMP1,TIMP2,ZYX	51
Liver Inflammation/Hepatitis	Inflammation of liver	7.91e-12	ADIPOQ,AHNAK,AHSA1,ALB,AP2A1,APOA1,APOA2,APOB,APOE,C3,C4A/C4B,C5,CCL2,CCN1,CD44,CD55,COL3A1,CREG1,CSF1,CXCL1,CXCL6,EGFR,EIF4A3,FAH,FAS,FASN,FKBP1A,FNTA,G3BP1,GAA,GSS,GSTP1,HGF,HLA-A,HMGB1,HMOX1,HNRNPU,HP,HPRT1,HPX,HSP90B1,HSPA5,IGF1,IL1RN,IL6,IMPDH2,KRT18,KRT8,LDLR,LGALS1,LGALS3,MAN2A1,METRNL,MMP2,MMP9,NAGLU,NAMPT,PF4,PLAUR,PPIA,PPP3CA,RACK1,S100A4,SERPINE1,SOD1,SOD2,SPARC,TFPI,TFRC,TGFB1,THOP1,T…	74
Kidney Failure	Failure of kidney	1.37e-11	ACE,ACTN4,ADAM17,ADH5,ADIPOQ,AGA,AGT,ALB,APOB,ARHGDIA,B2M,C3,C4A/C4B,C5,CCN1,CFB,COL4A3,DCN,F10,F2,F9,FBLN7,FDPS,FKBP1A,GBA1,GSS,GSTP1,HEXB,HGF,HMOX1,HPRT1,IL6,IMPDH2,KNG1,LAMC1,LDLR,LGMN,MDK,MMP14,MMP2,MMP9,MYH9,PCSK9,PPIA,PPP3CA,PTGDS,SERPINA3,SERPINC1,SERPINE1,STC1,TFPI,TGFB1,THBS1,TIMP1,TIMP2,TTR	56
Glomerular Injury	Abnormal morphology of podocytes	2.53e-11	ACTN4,ADIPOQ,ANGPTL4,APOL1,ARHGDIA,CD55,COL18A1,COL4A3,CTSK,DPP3,EHD3,FAT1,GRN,ITGB1,LAMB2,MYH9,NAGLU,PDGFRB	18
Glomerular Injury,Renal Inflammation,Renal Nephritis	Autoimmune glomerulonephritis	4.25e-11	ACE,ACTN4,AGT,ALB,APCS,C3,CFH,CFHR5,CLU,COL4A3,CTSL,FKBP1A,HPRT1,IL6,IMPDH2,PPIA,PPP3CA,PSMB1,PSMB2,PSMB5,PSMD1,PSMD2,PTGDS,TGFB1	24
Cardiac Enlargement	Enlargement of left ventricle	5.79e-11	ACE,ADAM17,ADIPOQ,AGT,APOE,BGN,CAPNS1,CRK,DES,EGFR,FKBP1A,FSTL3,GAA,GLA,IGF2R,IL6,LAMA4,LMNA,MDK,MGAT1,MME,MMP1,MMP2,MMP9,MYH11,MYLK3,NT5E,PDLIM5,PPP3CA,SERPINE1,SOD2,TIMP1,TIMP3,TPM1,VCL	35
Cardiac Dysfunction	Calcification of aortic valve	1e-10	APOA1,APOA2,APOA4,APOB,APOC3,APOD,APOL1,APOM,CTNNB1,MMP1,MMP2,MMP9,POSTN,TIMP1,TIMP2	15
Renal Proliferation	Proliferation of mesangial cells	2.42e-10	AGT,AKR1B1,APOE,BGN,C5,CTSK,DCN,EGFR,GAS6,HSPG2,IGF1,IL6,KNG1,PDGFRB,PLAUR,PPP3CA,SERPINB7,SPARC,TGFB1	19
Renal Inflammation,Renal Nephritis	Nephritis	2.55e-10	ACE,ACTN4,AGT,ALB,AMBP,APCS,APOL1,ARHGDIA,B4GALT1,BSG,C1QA,C3,C4A/C4B,C5,CCL2,CFB,CFH,CFHR5,CLU,COL4A1,COL4A3,CSF1,CTSL,DCN,EGFR,FAH,FAS,FKBP1A,FN1,GP1BA,GRN,HGF,HMOX1,HPRT1,ICAM1,IGF1,IGHM,IL1RN,IL6,IMPDH2,LAMB2,LTBP1,MAN2A1,MDK,METRNL,MFGE8,MGAT2,MIF,MMP9,MYH9,PARP1,PPIA,PPP3CA,PSMB1,PSMB2,PSMB5,PSMD1,PSMD2,PTGDS,RO60,S100A10,SERPINE1,TGFB1,VCAM1,YBX1	65
Kidney Failure	Kidney graft failure	3.18e-10	ADAM17,B2M,FKBP1A,HPRT1,IMPDH2,MMP14,MMP2,MMP9,PPIA,PPP3CA,SERPINA3,TGFB1,TIMP1,TIMP2	14
Glomerular Injury	Glomerulosclerosis	4.91e-10	ACTN4,ADIPOQ,AGA,AGT,APOE,APOL1,ARHGDIA,B4GALT1,C3,CCL2,CCN2,CD55,CLU,COL4A3,CTSK,CTSL,DCN,EGFR,FBLN7,FH,FKBP1A,GAS6,HGF,HMOX1,HUWE1,IMPDH2,ITGB1,KNG1,LGMN,MAN2A1,MMP14,MMP2,MYH9,PDGFRB,RAP1B,SPARC,STC1,TFPI2,TFRC,TGFB1,THY1	41
Renal Damage,Renal Tubule Injury	Damage of renal tubule	5.89e-10	ACE,AGT,APOE,C3,CAT,CD55,CD59,CFB,CSF1,FN1,HGF,ICAM1,MDK,PLAUR,RGMB,SERPINE1,TGFB1,THBS1,YBX1	19
Hepatocellular carcinoma,Liver Hyperplasia/Hyperproliferation	Invasion of hepatocellular carcinoma	5.95e-10	CTTN,EGFR,HMGB1,HNRNPA1,HSPA5,ICAM1,ITGA5,MMP2,NME1,PLAUR,RECK,SERPINE1,TIMP2	13
Cardiac Infarction	Acute myocardial infarction	8.6e-10	ACE,ADIPOQ,AGT,APOA1,APP,C3,C4A/C4B,C5,CXCL12,F10,F13A1,F2,F9,GSS,HGF,IL6,IL6ST,ITGAV,MME,PCSK9,PLG,PON1,POSTN,PPIA,PPP3CA,SERPINC1,TF,TUBA1C,TUBB,TUBB3	30
Renal Hydronephrosis	Hydronephrosis	1.03e-09	ADAMTS1,AGA,AGT,ALCAM,CCL2,CLU,DCN,FSTL1,GFRA1,HGF,IGF1,ITGB1,LAMC1,LGMN,MMP3,MMP9,MYH11,PLAUR,PSAP,PTN,SFRP2,TIMP3,TNFRSF11B	23
Renal Necrosis/Cell Death	Cell death of kidney cells	1.04e-09	AGT,ALB,API5,APOE,APOL1,APP,BGN,C3,C4A/C4B,C5,CAT,CCN2,CD44,CFB,CLU,COMP,CSF1,CTNNB1,CYCS,DCN,DCTN2,DLST,EEF1A1,EGFR,EZR,F2,FAS,GAPDH,GSN,GSTP1,HGF,HK1,HSPA1A/HSPA1B,HSPA5,HSPB1,HYOU1,ICAM1,IGF1,IGFBP3,ITGAV,ITGB1,LAMB2,LDHA,MAN2A1,MIF,NAMPT,NEO1,PARK7,PDCD6IP,PEA15,PKM,PPP3CA,PRMT1,PRNP,PTGDS,RBP4,RGMB,SERPINE1,SOD1,SOD2,TFPI2,TFRC,TGFB1,TIMP2,VCP,VTN,YWHAQ	67
Cardiac Enlargement	Enlargement of heart ventricle	1.34e-09	ACE,ADAM17,ADIPOQ,AGT,APOE,BGN,CAPNS1,CRK,CXCL12,DES,EGFR,FKBP1A,FSTL3,GAA,GLA,IGF1,IGF2R,IL6,INHBA,LAMA4,LMNA,MDK,MGAT1,MME,MMP1,MMP2,MMP9,MYH11,MYL9,MYLK3,NT5E,PDLIM5,PPP3CA,SERPINE1,SOD2,TIMP1,TIMP3,TPM1,TXN,VCL	40
Cardiac Enlargement	Enlargement of heart chamber	2.1e-09	ACE,ADAM17,ADIPOQ,AGT,APOE,BGN,CAPNS1,CRK,CXCL12,DES,EGFR,FKBP1A,FSTL3,GAA,GLA,HMOX1,IGF1,IGF2R,IL6,INHBA,LAMA4,LMNA,MDK,MGAT1,MME,MMP1,MMP2,MMP9,MYH11,MYL9,MYLK3,NT5E,PDLIM5,PPP3CA,SERPINE1,SOD2,TIMP1,TIMP3,TPM1,TXN,VCL	41
Cardiac Fibrosis	Fibrosis of heart	2.44e-09	ACE,ADAM17,ADIPOQ,AGT,APOA1,APOE,BGN,CAPNS1,CCN2,CTNNA1,CTSA,DAG1,DES,DPP3,F11,FAM114A1,FN1,FSTL3,GAS6,GLO1,GSN,HMOX1,IGHM,ITGB1,KRT18,LAMA4,LMNA,MFGE8,MME,MMP9,MYLK3,PDGFC,PLG,POSTN,PPP3CA,PRDX3,PSMB8,PTX3,SERPINE1,SIRPA,SOD2,SPTAN1,TGFB1,THBS2,TIMP1,TIMP3,TLN1,TNC	48
Liver Necrosis/Cell Death	Cell death of liver cells	3.82e-09	ADIPOQ,API5,APOE,CASP6,CAT,CFH,CTH,CTNNB1,CTSB,EGFR,FAH,FAS,FASN,GOT2,GSN,HDGF,HGF,HMGB1,HMOX1,HNRNPU,HSPD1,IGF1,IL1RN,IL6,IL6ST,INHBA,ITGAV,ITIH4,KRT18,KRT8,LDLR,LRP1,MMP9,NCL,PLG,SELENOP,SERPINA3,SERPINH1,SMPD1,SOD2,SPTBN1,TGFB1,TIMP1,TIMP3,VASN	45
Cardiac Dilation,Cardiac Enlargement	Dilated cardiomyopathy	3.91e-09	ACE,ACTN2,ADAM17,ADAMTS2,ADIPOQ,APOE,BGN,CAPNS1,CAST,COL3A1,CRK,DAG1,DES,F10,F9,FASN,FHL2,FKBP1A,FLNC,FN1,FSTL3,GAA,GAS6,GLA,IGF2R,IL6,LAMA2,LAMA4,LMNA,MFGE8,MGAT1,MMP1,MMP10,MMP14,MMP2,MMP9,MYH11,MYH9,PDGFC,PDLIM5,PGK1,PPP1CA,PRKAR1A,PTGDS,RTN4,SERPINE1,SIRPA,SOD2,TGFB1,THBS2,TIMP1,TIMP2,TIMP3,TLN1,TPI1,TPM1,TXNRD2,VCL,XYLT1	59
Cardiac Stenosis	Non-rheumatic aortic stenosis	4.27e-09	F10,F2,ICAM1,MMP1,MMP2,MMP3,MMP9,SERPINC1,VCAM1	9
Renal Proliferation	Proliferation of kidney cells	5.78e-09	AGT,AKR1B1,APOE,BGN,C5,CSF1,CTSK,DCN,EGFR,GAS6,HGF,HSPG2,IGF1,IL6,KNG1,MMP14,PDGFRB,PLAUR,PPP3CA,SERPINB7,SPARC,TGFB1	22
Liver Cirrhosis	Cirrhosis	6.6e-09	ADAM17,ADAMTS1,AGT,ALB,APOA1,APOA2,APOB,B2M,BSG,CCL2,CCN2,CHI3L1,COL1A1,COL3A1,CSF1,CTNNB1,DNASE2,F10,F2,F9,FBLN1,FBLN2,FN1,FST,GLG1,GSTP1,HGF,HNRNPK,IL6,IMPDH2,ITGA5,KRT18,KRT8,LDLR,MACROH2A1,MMP2,MMP9,NT5E,PDGFRB,PPIA,PPP3CA,PRMT1,SERPINA1,SERPINC1,SPARC,TF,TGFB1,TIMP1,VWF,WNT2	50
Cardiac Arrythmia	Arrhythmia	7.63e-09	ACE,ACTN2,AGT,ANXA1,ASPH,CALM1 (includes others),CALR,CCL2,CDH2,CHI3L1,COL3A1,COL5A1,DES,F10,F2,F9,FBN1,FHL2,FLNA,FLNC,HMGB1,IL6,KHDRBS1,KITLG,LAMA4,LAMC1,LMNA,MMP1,MMP2,MMP9,MYH11,NRDC,PLEC,PPP1CA,PRKAR1A,PSMB8,SERPINC1,SERPINE1,SPTAN1,TF,TFPI,TGFB1,TIMP1,TPM1,TTR,TUBA1C,TUBB,TUBB3,TXN,VCAM1,VCL,VWF	52
Liver Necrosis/Cell Death	Apoptosis of liver	9.45e-09	ADIPOQ,API5,APP,CASP6,CAT,CFH,CTNNB1,CTSB,EGFR,FAH,FAS,GOT2,GSN,HGF,HMGB1,IGF1,IL6,IL6ST,INHBA,ITGAV,ITIH4,KRT18,KRT8,LDLR,MMP9,NCL,PLG,SELENOP,SERPINH1,SMPD1,SOD2,SPTBN1,TGFB1,TIMP1,TIMP3,TKT,VASN	37
Glomerular Injury,Renal Inflammation,Renal Nephritis	Glomerulonephritis	1.36e-08	ACE,ACTN4,AGT,ALB,APCS,APOL1,B4GALT1,BSG,C1QA,C3,C4A/C4B,C5,CCL2,CFH,CFHR5,CLU,COL4A3,CTSL,EGFR,FAS,FKBP1A,FN1,GP1BA,HGF,HMOX1,HPRT1,ICAM1,IL1RN,IL6,IMPDH2,LAMB2,LTBP1,MAN2A1,MFGE8,MGAT2,MIF,MMP9,MYH9,PPIA,PPP3CA,PSMB1,PSMB2,PSMB5,PSMD1,PSMD2,PTGDS,RO60,S100A10,SERPINE1,TGFB1,VCAM1	51
Cardiac Stenosis	Stenosis of cardiac valve	1.95e-08	ACE,APOB,ELN,F10,F2,F9,ICAM1,LDLR,MMP1,MMP2,MMP3,MMP9,MYH11,SERPINC1,TF,TIMP1,TIMP2,VCAM1	18
Liver Hyperplasia/Hyperproliferation	Development of liver tumor	2.89e-08	ACTN4,AGT,BSG,CCDC80,CTNNB1,EGFR,FAH,FAS,HGF,IL6,IL6ST,IQGAP1,ITIH4,KRT18,LGALS1,LGALS3,MAPK1,PDGFC,PKM,PRDX1,PRKAR1A,PRMT1,PSMB9,S100A4,SOD1,SPTBN1,SRPX,TGFB1,VCAN,XRCC6	30
Glomerular Injury	Effacement of pedicels	3.06e-08	ACTN4,ANGPTL4,APOL1,COL18A1,COL4A3,CTSK,DPP3,EHD3,FAT1,GRN,ITGB1,LAMB2,MYH9	13
Liver Necrosis/Cell Death	Apoptosis of liver cells	4.26e-08	ADIPOQ,API5,CASP6,CAT,CFH,CTNNB1,CTSB,EGFR,FAH,FAS,GOT2,GSN,HGF,HMGB1,IGF1,IL6,IL6ST,INHBA,ITGAV,ITIH4,KRT18,KRT8,LDLR,MMP9,NCL,PLG,SELENOP,SERPINH1,SMPD1,SOD2,SPTBN1,TGFB1,TIMP1,TIMP3,VASN	35
Cardiac Enlargement	Hypertrophy of heart cells	5.31e-08	ADIPOQ,AGT,CCN2,CTSB,CTSC,CTSD,EEF1D,EGFR,FHL2,FN1,FSTL3,GPX3,HGF,HMGB1,HPRT1,IGF1,IGF2R,IL6,INHBA,LMCD1,MAPK1,MDK,MFGE8,MMP2,MMP9,PPIA,PPP3CA,S100A10,S100A6,SERPINE1,SPTAN1,TGFBR3,TIMP1,TXN	34
Cardiac Necrosis/Cell Death	Apoptosis of heart cells	5.54e-08	ADIPOQ,AGT,APOA1,CALR,CAT,CCN1,CREG1,CTNNB1,FAS,FASN,FSTL1,FSTL3,GAPDH,GNB1,GSN,HGF,HMOX1,HSPD1,HSPE1,IGF1,IL1RN,IL6,IL6ST,INHBA,KNG1,MAPK1,MDK,MMP2,NAMPT,PARK7,PLRG1,PPP3CA,PTN,RTN4,S100A6,SERPINF1,SFRP2,SOD2,TIMP2	39
Cardiac Necrosis/Cell Death	Apoptosis of cardiomyocytes	6.42e-08	ADIPOQ,AGT,APOA1,CALR,CAT,CCN1,CREG1,FAS,FASN,FSTL1,FSTL3,GAPDH,GNB1,GSN,HGF,HMOX1,HSPD1,HSPE1,IGF1,IL1RN,IL6,IL6ST,INHBA,KNG1,MAPK1,MDK,MMP2,NAMPT,PARK7,PLRG1,PPP3CA,PTN,RTN4,S100A6,SERPINF1,SFRP2,SOD2,TIMP2	38
Hepatocellular carcinoma,Liver Hyperplasia/Hyperproliferation	Development of hepatocellular carcinoma	6.8e-08	AGT,BSG,CCDC80,CTNNB1,EGFR,FAH,FAS,HGF,IL6,IQGAP1,KRT18,LGALS1,LGALS3,PDGFC,PKM,PRDX1,PRKAR1A,PRMT1,PSMB9,S100A4,SOD1,SPTBN1,TGFB1,VCAN,XRCC6	25
Cardiac Arrythmia	Arrhythmia with structural heart disease	7.7e-08	ACE,ACTN2,AGT,ANXA1,CCL2,CDH2,CHI3L1,COL3A1,DES,F10,F2,F9,FHL2,IL6,KHDRBS1,LAMA4,LMNA,MMP1,MMP9,PLEC,PPP1CA,PRKAR1A,PSMB8,SERPINC1,SERPINE1,TF,TFPI,TGFB1,TIMP1,TPM1,TUBA1C,TUBB,TUBB3,VCAM1,VCL,VWF	36
Renal Necrosis/Cell Death	Apoptosis of kidney cells	1.2e-07	AGT,ALB,APOE,BGN,C3,C4A/C4B,C5,CCN2,CFB,CLU,CSF1,CTNNB1,DCN,EGFR,HGF,IGF1,ITGB1,LAMB2,MAN2A1,PKM,PPP3CA,SOD2,TFPI2,TGFB1,TIMP2	25
Cardiac Arteriopathy	Disorder of coronary artery	1.24e-07	ACAT2,ACE,ADIPOQ,AGT,APOA1,APOB,APOC3,APOE,BGN,CA12,CCL2,CD55,CDH13,COL5A2,DPP4,EIF4A3,F10,F2,F9,FKBP1A,FN1,GAA,GBE1,GSS,GSTO1,ICAM1,IL1RN,IL6,ITGAV,LDLR,LOX,LPA,LRP1,LTBP1,NNMT,PCSK9,PF4,PKM,PLG,PON1,PRCP,SERPINC1,SERPINE1,SNRPD2,SOD1,TF,TGFB1,THBS1,TKT,TUBA1C,TUBB,TUBB3,VCAM1	53
Renal Damage	Acute kidney injury	1.49e-07	AGT,AHSG,AKR1A1,ALB,AMBP,ANPEP,B2M,C5,CA12,CCN1,CD5L,CLU,CST3,GSS,HMOX1,LYZ,MME,NAGLU,PKM,RGMB,SERPINA3	21
Liver Fibrosis	Migration of hepatic stellate cells	1.57e-07	ADIPOQ,AGT,CCL2,CCN2,CD44,HMGB1,IGF1,LGALS1,MIF,RACK1,TGFB1	11
Liver Cirrhosis,Liver Fibrosis	Cirrhosis of liver	1.62e-07	AGT,ALB,APOA1,APOA2,APOB,B2M,BSG,CCL2,CCN2,CHI3L1,COL1A1,COL3A1,CTNNB1,DNASE2,FN1,FST,GLG1,HGF,HNRNPK,IL6,IMPDH2,ITGA5,KRT18,KRT8,LDLR,MMP2,MMP9,NT5E,PDGFRB,PPIA,PPP3CA,PRMT1,SERPINA1,SERPINC1,TF,TGFB1,VWF,WNT2	38
Glomerular Injury,Renal Inflammation,Renal Nephritis	Focal glomerulonephritis	1.62e-07	ACE,ACTN4,AGT,C3,CCL2,HGF,HPRT1,IMPDH2,PSMB1,PSMB2,PSMB5,PSMD1,PSMD2	13
Cardiac Stenosis	Stenosis of semilunar valve	2.37e-07	APOB,ELN,F10,F2,ICAM1,LDLR,MMP1,MMP2,MMP3,MMP9,MYH11,SERPINC1,TF,TIMP1,TIMP2,VCAM1	16
Kidney Failure	Chronic renal failure	2.81e-07	ACE,ADIPOQ,AGA,AGT,APOB,C3,C4A/C4B,C5,COL4A3,DCN,F10,F2,F9,FBLN7,FDPS,FKBP1A,GSS,HGF,IL6,IMPDH2,KNG1,LDLR,LGMN,MMP14,MMP2,MYH9,PCSK9,PPIA,PPP3CA,SERPINC1,SERPINE1,STC1,TFPI,TGFB1,TTR	35
Liver Steatosis	Hepatic steatosis	2.95e-07	ACAA2,ACE,ACLY,ADIPOQ,AGT,AHNAK,AHSA1,APOB,APOE,ATP5F1A,BCAT1,BLVRA,BSG,C3,CAT,CCL2,CD44,CLU,CNPY2,CREG1,CSPG4,CTHRC1,DAG1,DPP4,DPP7,EGFR,EIF4A3,FABP5,FASN,FSTL3,GSTP1,HMOX1,HNRNPU,HSD17B4,IL6,IL6ST,IMPDH2,KRT18,KRT8,LDLR,LGALS3,LIPA,LMNA,LPA,LTA4H,LXN,MACROH2A1,MANF,NUCKS1,PARP1,PDGFC,PKM,PLA2G15,PLIN3,PXDN,S100A10,S100A4,SERPINA1,SERPINA3,SIRPA,SOD1,SOD2,SPTBN1,TKT,WNT2	65
Liver Proliferation	Proliferation of hepatocytes	2.95e-07	AGT,C3,C5,CCN1,CTNNB1,CXCL12,DDB1,EGFR,FAH,FAS,FGF7,HGF,IGF1,IL1RN,IL6,IL6ST,INHBA,ITGB1,ITIH4,KITLG,MAPK1,MDK,PIK3IP1,PLG,PTN,RTN4,SPTBN1,SULF2,TGFB1,THBS1,TIMP1	31
Cardiac Inflammation	Carditis	3.06e-07	ACE,ADIPOQ,ANXA1,CCL2,CLU,F10,F9,FCN3,HPRT1,IGHM,IL1RN,IMPDH2,MME,MMP2,MMP9,TGFB1,TUBA1C,TUBB,TUBB3	19
Cardiac Stenosis	Stenosis of aortic valve	3.73e-07	APOB,ELN,F10,F2,ICAM1,LDLR,MMP1,MMP2,MMP3,MMP9,SERPINC1,TF,TIMP1,TIMP2,VCAM1	15
Liver Hyperplasia/Hyperproliferation	Stage IV liver cholangiocarcinoma	3.77e-07	PSMB1,PSMB2,PSMB5,PSMD1,PSMD2	5
Liver Hyperplasia/Hyperproliferation	Liver metastasis	4.32e-07	ACTN4,BMP1,CCL2,CD44,COL1A1,CTNNB1,DPYSL3,EGFR,HSP90AA1,HSP90AB1,HSP90B1,IGFBP2,PDGFRA,PDGFRB,PLAUR,PRNP,SERPINE1,SOD2,TOP1	19
Heart Failure	Failure of heart	5.74e-07	ACE,ADIPOQ,AGT,BMP1,CA12,CAPNS1,CCN2,CST3,CXCL12,DES,DPP4,F10,F9,FAM114A1,FKBP1A,GSS,HMGB1,HPRT1,IDUA,IGF1,IGF2R,IL6,KRT18,KRT8,LMNA,MAPK1,MME,MMP9,MYLK3,NAE1,NOTCH3,PARK7,PEBP1,PPIF,PPP2R1A,PPP3CA,PTPA,SERPINE1,SPTAN1,TF,TGFB1,TIMP1,TIMP3,TLL1,TUBA1C,TUBB,TUBB3,VCL,VWF	49
Liver Inflammation/Hepatitis	Viral hepatitis	5.78e-07	ADIPOQ,ALB,AP2A1,APOE,C3,C4A/C4B,C5,CCL2,COL3A1,CSF1,EGFR,FKBP1A,FNTA,G3BP1,GAA,HGF,HMGB1,HSP90B1,HSPA5,IGF1,IL6,IMPDH2,KRT18,KRT8,MMP9,PPIA,PPP3CA,RACK1,S100A4,TFRC,TGFB1,TIMP1	32
Renal Enlargement	Nephromegaly	6.03e-07	ADIPOQ,AGT,BGN,CAT,EHD3,FAH,GRN,ICAM1,IGF2R,MAPK1,PARK7,PDGFRB,PLG,PPP3CA,SPTBN1,TGFB1,TIMP3	17
Liver Hyperplasia/Hyperproliferation	Intrahepatic bile duct cancer	6.48e-07	CDH2,CTNNB1,EGFR,FAP,FH,FN1,GSTP1,HSP90AA1,HSP90AB1,HSP90B1,IDH1,MME,PDGFRA,PDGFRB,PLXNB2,PSMB1,PSMB2,PSMB5,PSMD1,PSMD2,RBMX,THBS1,TOP1,TUBA1C,TUBB3	25
Renal Necrosis/Cell Death	Cell death of renal tubule	6.65e-07	AGT,ALB,C3,C4A/C4B,C5,CAT,CFB,CLU,CSF1,DCN,EGFR,HGF,HMOX1,ICAM1,IGF1,PARP1,PKM,RGMB,TGFB1,THBS1	20
Kidney Failure	End stage renal disease	7.59e-07	ACE,ADIPOQ,AGA,AGT,C3,C4A/C4B,C5,COL4A3,DCN,F10,F2,FBLN7,FDPS,FKBP1A,GSS,HGF,IL6,IMPDH2,KNG1,LGMN,MMP14,MMP2,MYH9,PCSK9,PPIA,PPP3CA,SERPINC1,STC1,TGFB1,TTR	30
Nephrosis	Nephrosis	8.39e-07	ACTN4,ALB,ANXA1,ARHGDIA,ATP6V1A,C3,C4A/C4B,C5,CA12,CLTC,CLU,COL4A3,CST3,F10,F2,FAT1,FKBP1A,FN1,GLA,GSTP1,IMPDH2,ITGA2,ITGB1,LAMA5,LAMB2,MXRA5,MYH9,PPP3CA,SERPINC1,TGFB1	30
Kidney Failure	Chronic allograft nephropathy	1.14e-06	ADAM17,MMP14,MMP2,MMP9,PPIA,PPP3CA,TGFB1,TIMP1,TIMP2	9
Renal Necrosis/Cell Death	Cell death of tubular cells	1.22e-06	AGT,ALB,C3,C4A/C4B,C5,CAT,CFB,CLU,CSF1,DCN,EGFR,HGF,ICAM1,IGF1,PKM,RGMB	16
Renal Damage,Renal Tubule Injury	Damage of tubulointerstitium	1.43e-06	ACE,APOE,FN1,HGF,MDK,PLAUR,SERPINE1,TGFB1	8
Increased Levels of Creatinine	Increased Levels of Creatinine	1.47e-06	ACE,AGT,AKR1B1,ARHGDIA,C3,C5,CCN2,CD44,CFB,FBLN7,GRN,ICAM1,IL6,PARP1,PPP3CA,TIMP2	16
Renal Necrosis/Cell Death	Cell death of kidney cell lines	1.49e-06	AGT,API5,APOL1,APP,CAT,CD44,COMP,CTNNB1,CYCS,DCTN2,DLST,EEF1A1,EGFR,EZR,F2,FAS,GAPDH,GSN,GSTP1,HGF,HK1,HSPA1A/HSPA1B,HSPA5,HSPB1,HYOU1,IGF1,IGFBP3,ITGAV,ITGB1,LDHA,MIF,NAMPT,NEO1,PARK7,PDCD6IP,PEA15,PRMT1,PRNP,PTGDS,RBP4,RGMB,SERPINE1,SOD1,SOD2,TFRC,TGFB1,TIMP2,VCP,VTN,YWHAQ	50
Glomerular Injury	Abnormal morphology of mesangial matrix	1.61e-06	AGT,APOE,B4GALT1,BSG,CFH,CFI,CLU,COL18A1,COL4A3,EHD3	10
Glomerular Injury	Abnormal morphology of mesangium	1.76e-06	AGT,APOE,ARHGDIA,B4GALT1,BSG,CFH,CFI,CLU,COL18A1,COL4A3,EHD3	11
Liver Hyperplasia/Hyperproliferation	Liver cholangiocarcinoma	1.8e-06	CDH2,CTNNB1,EGFR,FAP,FH,FN1,GSTP1,HSP90AA1,HSP90AB1,HSP90B1,IDH1,MME,PDGFRA,PDGFRB,PLXNB2,PSMB1,PSMB2,PSMB5,PSMD1,PSMD2,RBMX,THBS1,TUBA1C,TUBB3	24
Cardiac Arteriopathy	Coronary artery disease	2.08e-06	ACAT2,ACE,ADIPOQ,AGT,APOA1,APOB,APOC3,APOE,CCL2,CD55,CDH13,COL5A2,EIF4A3,F10,F2,F9,FN1,GBE1,GSTO1,ICAM1,IL6,LDLR,LOX,LPA,LRP1,NNMT,PCSK9,PF4,PKM,PON1,PRCP,SERPINC1,SERPINE1,SNRPD2,TGFB1,THBS1,TKT,VCAM1	38
Liver Necrosis/Cell Death	Cell death of hepatocytes	2.11e-06	ADIPOQ,CASP6,CAT,CTH,CTNNB1,CTSB,EGFR,FAH,FAS,FASN,GOT2,GSN,HGF,HMGB1,HMOX1,HNRNPU,IL1RN,IL6,INHBA,ITIH4,KRT18,KRT8,LDLR,LRP1,NCL,PLG,SELENOP,SMPD1,SOD2,SPTBN1,TGFB1,TIMP3,VASN	33
Glomerular Injury,Renal Inflammation,Renal Nephritis	Membranous glomerulonephritis	2.16e-06	ACTN4,ALB,APCS,CLU,COL4A3,CTSL,FKBP1A,IMPDH2,PPIA,PPP3CA,PTGDS,TGFB1	12
Renal Proliferation	Cell proliferation of kidney cell lines	2.29e-06	AGT,CRK,CSF1,CTNNB1,DLST,EGFR,FBLN2,FBN2,GRN,HGF,HSP90AA1,HSP90AB1,HSPA4,HSPD1,IL6,ITGA5,ITGB1,KNG1,LMNA,LOX,MMP14,NCL,PA2G4,PKM,PLAUR,PPP2R1A,PSMD2,QPCT,SDCBP,SFPQ,TGFB1,TPP2,TTR,TXNRD1	34
Liver Necrosis/Cell Death	Apoptosis of hepatic stellate cells	2.59e-06	ADIPOQ,FAS,HGF,IGF1,ITGAV,MMP9,SERPINH1,TGFB1,TIMP1	9
Liver Damage	Liver Damage	3.1e-06	ADIPOQ,ALB,APOE,APP,BPNT1,BSG,C3,CD44,CFH,CREG1,CTNNB1,CTSB,CXCL1,F2,FAS,GSS,GSTP1,HLA-A,HMGB1,HMOX1,IGF1,IL1RN,IL6,IL6ST,INHBA,KNG1,KRT18,KRT8,MIF,MMP9,NT5E,PLG,RDX,SERPINA1,SERPINA4,SERPINE1,SERPING1,SMPD1,SOD1	39
Renal Damage	Reperfusion injury of kidney	3.13e-06	C3,C5,CD44,CD55,CFB,CFP,MBL2,PARP1,TGFB1,THBS1,TLN1	11
Renal Necrosis/Cell Death	Necrosis of renal tubule	3.63e-06	AGT,ALB,C3,C4A/C4B,C5,CAT,CFB,CLU,CSF1,DCN,EGFR,HGF,HMOX1,ICAM1,IGF1,PKM,RGMB,TGFB1	18
Cardiac Arrythmia	Cardiac fibrillation	3.78e-06	ACE,ACTN2,AGT,ANXA1,CCL2,CHI3L1,COL3A1,F10,F2,F9,IL6,KHDRBS1,LAMA4,LMNA,MMP1,MMP9,PPP1CA,PSMB8,SERPINC1,SERPINE1,TF,TFPI,TGFB1,TIMP1,TUBA1C,TUBB,TUBB3,VCAM1,VCL,VWF	30
Glomerular Injury	Glomerulopathy of mesangium	4.52e-06	AGT,APOE,ARHGDIA,B4GALT1,BSG,CFH,CFI,CLU,COL18A1,COL4A3,EHD3,ICAM1	12
Renal Necrosis/Cell Death	Cell death of renal glomerulus	4.97e-06	AGT,APOE,BGN,C1QA,CCN2,CTNNB1,EHD3,ITGB1,LAMB2,MAN2A1,PKM,PLG,PPP3CA,SOD2,TFPI2,TGFB1	16
Glomerular Injury,Renal Inflammation,Renal Nephritis	IgA nephropathy	5.37e-06	ACE,ACTN4,AGT,C3,HPRT1,IMPDH2,PSMB1,PSMB2,PSMB5,PSMD1,PSMD2	11
Glomerular Injury,Renal Inflammation,Renal Nephritis	Proliferative glomerulonephritis	5.49e-06	ACE,ACTN4,AGT,C3,CFH,CFHR5,HPRT1,IMPDH2,PSMB1,PSMB2,PSMB5,PSMD1,PSMD2	13
Decreased Levels of Albumin	Decreased Levels of Albumin	6.93e-06	ALB,C3,CD55,COL2A1,FLNA,IL1RN,IL6,LAMB2,LGALS3,TGFB1,UBA2	11
Renal Necrosis/Cell Death	Apoptosis of renal glomerulus	7.21e-06	AGT,APOE,BGN,C1QA,CCN2,CTNNB1,EHD3,ITGB1,LAMB2,MAN2A1,PKM,PPP3CA,SOD2,TFPI2,TGFB1	15
Glomerular Injury	Glomerular crescent	7.59e-06	C1QA,COL4A3,GAS6,HMOX1,MIF,PLG,RPS19,SERPINE1,STC1	9
Liver Damage	Hepatic injury	7.97e-06	ADIPOQ,APOE,BSG,CFH,CREG1,CTNNB1,CTSB,CXCL1,F2,FAS,HLA-A,HMGB1,HMOX1,IL1RN,IL6,IL6ST,INHBA,KNG1,KRT18,KRT8,MMP9,NT5E,RDX,SERPINA1,SERPINE1,SERPING1,SOD1	27
Liver Necrosis/Cell Death	Focal necrosis of liver	8.68e-06	AGA,APOE,C3,FGA,KRT18,LGALS3,PLG,TGFB1	8
Cardiac Arrythmia	Atrial fibrillation	8.73e-06	ACE,AGT,ANXA1,CCL2,CHI3L1,COL3A1,F10,F2,F9,IL6,KHDRBS1,LAMA4,MMP1,MMP9,PPP1CA,PSMB8,SERPINC1,SERPINE1,TF,TFPI,TGFB1,TIMP1,TUBA1C,TUBB,TUBB3,VCAM1,VWF	27
Liver Necrosis/Cell Death	Apoptosis of hepatocytes	8.73e-06	ADIPOQ,CASP6,CAT,CTNNB1,CTSB,EGFR,FAH,FAS,GOT2,GSN,HGF,HMGB1,IL6,INHBA,ITIH4,KRT18,KRT8,LDLR,NCL,PLG,SELENOP,SMPD1,SOD2,SPTBN1,TGFB1,TIMP3,VASN	27
Glomerular Injury,Renal Fibrosis	Fibrosis of kidney	9.78e-06	ADIPOQ,AGA,AGT,C3,CCL2,CLU,COL4A3,CTSK,DCN,FBLN7,FH,FKBP1A,HGF,IMPDH2,ITGB1,KNG1,LGMN,MAN2A1,MMP14,MMP2,STC1,TFPI2,TFRC,TGFB1,THY1	25
Liver Inflammation/Hepatitis	Infection by Hepatitis C virus	1.05e-05	ADIPOQ,ALB,APOE,CCL2,CSF1,EGFR,FKBP1A,G3BP1,GAA,HMGB1,HSPA5,IGF1,IL6,IMPDH2,KRT18,KRT8,PPIA,PPP3CA,RACK1,S100A4,TFRC,TGFB1	22
Cardiac Arrythmia	Familial arrhythmia	1.07e-05	ACTN2,CALM1 (includes others),CDH2,COL5A1,DES,FBN1,FHL2,FLNA,FLNC,LAMA4,LAMC1,LMNA,MYH11,PLEC,PRKAR1A,TPM1,TTR,TUBB3,VCL	19
Glomerular Injury,Kidney Failure,Renal Fibrosis	Interstitial fibrosis of kidney	1.09e-05	ADIPOQ,AGA,AGT,C3,COL4A3,DCN,FBLN7,FKBP1A,HGF,IMPDH2,KNG1,LGMN,MMP14,MMP2,STC1,TGFB1	16
Renal Necrosis/Cell Death	Apoptosis of renal tubule	1.18e-05	AGT,ALB,C3,C4A/C4B,C5,CFB,CLU,CSF1,DCN,EGFR,HGF,HMOX1,IGF1,PARP1,THBS1	15
Liver Hyperplasia/Hyperproliferation	Hepatoblastoma	1.29e-05	COL7A1,CTNNB1,EXT2,FAH,FAS,FH,FKBP1A,FLNA,GBA1,HSP90AA1,HSP90AB1,HSP90B1,RPS19,SERPINA1,TOP1,TUBA1C,TUBB3	17
Glomerular Injury	Familial glomerulopathy	1.34e-05	ACE,ACTN4,AGT,APOE,APOL1,C3,CFH,CFHR5,COL4A3,FN1	10
Cardiac Arrythmia	Supraventricular arrhythmia	1.37e-05	ACE,AGT,ANXA1,CALR,CCL2,CHI3L1,COL3A1,F10,F2,F9,IL6,KHDRBS1,LAMA4,MMP1,MMP9,PPP1CA,PSMB8,SERPINC1,SERPINE1,TF,TFPI,TGFB1,TIMP1,TUBA1C,TUBB,TUBB3,VCAM1,VWF	28
Cardiac Fibrosis	Fibrosis of myocardium	1.43e-05	ADAM17,AGT,DAG1,DES,ITGB1,KRT18,MMP9,SERPINE1,TIMP1	9
Cardiac Enlargement	Hypertrophy of cardiac muscle	1.69e-05	ADAM17,ADIPOQ,AGT,CCN2,EGFR,FHL2,FN1,FSTL3,HGF,HMGB1,IGF1,IGF2R,IL6,IL6ST,INHBA,LMCD1,MAPK1,MDK,MFGE8,MMP2,MMP9,PARP1,PPIA,PPP3CA,SERPINE1,SPTAN1,TGFBR3,TIMP1,TWF1,TXN	30
Renal Atrophy	Atrophy of renal tubule	1.82e-05	ACE,AGA,AGT,COL4A3,DCN,EGFR,LGMN,MMP2	8
Renal Damage,Renal Tubule Injury	Injury of renal tubule	1.92e-05	AGT,C3,CAT,CD55,CD59,CFB,HGF,ICAM1,RGMB	9
Cardiac Damage	Damage of myocardium	1.94e-05	ADIPOQ,AGT,C5,DES,IGF1,SERPINE1,SERPING1	7
Kidney Failure	Allogeneic kidney transplant rejection	1.94e-05	B2M,FKBP1A,HPRT1,IMPDH2,PPIA,PPP3CA,SERPINA3	7
Liver Cirrhosis,Liver Fibrosis	Primary liver cirrhosis	2.21e-05	APOB,B2M,BSG,CCL2,CCN2,COL3A1,CTNNB1,FN1,FST,GLG1,HGF,HNRNPK,IMPDH2,ITGA5,LDLR,PDGFRB,PPIA,PPP3CA,WNT2	19
Cardiac Enlargement	Hypertrophy of cardiomyocytes	2.49e-05	ADIPOQ,AGT,CCN2,EGFR,FHL2,FN1,FSTL3,HGF,HMGB1,IGF1,IGF2R,IL6,INHBA,LMCD1,MAPK1,MDK,MFGE8,MMP2,MMP9,PPIA,PPP3CA,SERPINE1,SPTAN1,TGFBR3,TIMP1,TXN	26
Cardiac Damage	Damage of heart	2.51e-05	ADIPOQ,AGT,ANXA1,BGN,C5,CBR1,DES,HMOX1,IGF1,INHBA,LAMA4,MAPK1,MMP9,POSTN,SERPINE1,SERPING1,TXN	17
Cardiac Damage	Damage of cardiac muscle	2.82e-05	ADIPOQ,AGT,C5,DES,IGF1,LAMA4,MAPK1,SERPINE1,SERPING1,TXN	10
Liver Hyperplasia/Hyperproliferation	Advanced liver cholangiocarcinoma	2.98e-05	EGFR,HSP90AA1,HSP90AB1,HSP90B1,PDGFRB,PSMB1,PSMB2,PSMB5,PSMD1,PSMD2,TUBA1C,TUBB3	12
Glomerular Injury,Renal Necrosis/Cell Death	Necrosis of renal glomerulus	3.27e-05	AGT,APOE,BGN,CCN2,CTNNB1,ITGB1,LAMB2,MAN2A1,PKM,PLG,PPP3CA,SOD2,TFPI2,TGFB1	14
Cardiac Dysfunction,Cardiac Stenosis	Calcific aortic valve stenosis	3.98e-05	MMP1,MMP2,MMP9,TIMP1,TIMP2	5
Cardiac Damage	Injury of myocardium	3.98e-05	ADIPOQ,AGT,C5,IGF1,SERPING1	5
Liver Adhesion	Adhesion of liver cells	3.98e-05	ADAM12,CCN2,ICAM1,KRT8,VCAM1	5
Renal Damage	Damage of kidney cells	4.77e-05	AGT,C3,CAT,CTNNB1,GRN,ICAM1,RGMB,YBX1	8
Glomerular Injury	Formation of glomerular crescent	4.77e-05	C1QA,COL4A3,GAS6,HMOX1,MIF,PLG,SERPINE1,STC1	8
Glomerular Injury,Renal Necrosis/Cell Death	Apoptosis of glomerular cells	5.68e-05	AGT,APOE,BGN,CCN2,CTNNB1,ITGB1,LAMB2,MAN2A1,PKM,PPP3CA,SOD2,TFPI2,TGFB1	13
Liver Cirrhosis,Liver Fibrosis	Primary biliary cirrhosis	6.7e-05	APOB,B2M,BSG,CCL2,CCN2,COL3A1,CTNNB1,FST,GLG1,HGF,HNRNPK,IMPDH2,ITGA5,LDLR,PDGFRB,PPIA,PPP3CA,WNT2	18
Cardiac Necrosis/Cell Death	Cell viability of cardiomyocytes	7.29e-05	ADIPOQ,AGT,APOD,CALR,CTH,HGF,HSPD1,IGF1,IQGAP1,LRP1,PARP1	11
Cardiac Dysfunction	Right ventricular dysfunction	7.63e-05	AGT,F10,F2,PLG,SERPINC1	5
Increased Levels of Hematocrit	Increased Levels of Hematocrit	8.11e-05	ACE,APOE,B4GALT1,CD59,CIAPIN1,CLEC11A,F9,FBLN1,FERMT3,HMOX1,LAMA4,LGMN,PRDX1,PRDX2,SERPINE1,SOD2	16
Renal Necrosis/Cell Death	Apoptosis of tubular cells	9.87e-05	AGT,ALB,C3,C4A/C4B,C5,CFB,CLU,CSF1,DCN,EGFR,HGF,IGF1	12
Renal Damage,Renal Tubule Injury	Damage of tubular cells	0.0001	CAT,ICAM1,RGMB,YBX1	4
Cardiac Arrythmia	Non-valvular atrial fibrillation	0.0001	F10,F2,F9,SERPINC1	4
Cardiac Stenosis	Stenosis of mitral valve	0.0001	ACE,F10,F2,F9	4
Renal Inflammation,Renal Nephritis	Tubular nephritis	0.0001	COL4A3,DCN,IGHM,MDK	4
Renal Enlargement	Hypertrophy of kidney	0.000104	ADIPOQ,AGT,BGN,CAT,EHD3,ICAM1,MAPK1,PARK7,PDGFRB,PPP3CA,TGFB1	11
Renal Necrosis/Cell Death	Apoptosis of kidney cell lines	0.000111	AGT,API5,APP,CAT,CD44,COMP,CTNNB1,CYCS,EEF1A1,EZR,F2,FAS,GSN,HGF,HSPA1A/HSPA1B,HSPA5,HSPB1,HYOU1,IGF1,IGFBP3,ITGAV,ITGB1,MIF,PARK7,PEA15,PRMT1,PTGDS,RBP4,SERPINE1,SOD2,TFRC,TGFB1,TIMP2,VTN,YWHAQ	35
Cardiac Dysfunction	Dysfunction of left ventricle	0.000112	ANGPTL4,CAST,CSF1,DPP4,FSTL3,MMP9,PTX3,SERPINE1,TIMP1	9
Liver Hyperplasia/Hyperproliferation	Liver hyperplasia	0.000119	C3,CDH2,IGF2R,KITLG,SERPINC1,SOD1,TIMP1	7
Nephrosis	Minimal change nephrotic syndrome	0.000119	ACTN4,CLU,CST3,FKBP1A,IMPDH2,PPP3CA,TGFB1	7
Liver Hyperplasia/Hyperproliferation	Advanced liver tumor	0.000125	AXL,BSG,EGFR,HSP90AA1,HSP90AB1,HSP90B1,PDGFRA,PDGFRB,PSMB1,PSMB2,PSMB5,PSMD1,PSMD2,TUBA1C,TUBB3	15
Cardiac Inflammation	Rheumatic carditis	0.000134	ACE,ANXA1,F10,F9,FCN3	5
Liver Hyperplasia/Hyperproliferation	Non-well differentiated fetal hepatoblastoma	0.00014	HSP90AA1,HSP90AB1,HSP90B1	3
Cardiac Pulmonary Embolism	Recurrent pulmonary embolism	0.00014	F10,F2,F9	3
Glomerular Injury	C3 glomerulopathy	0.00014	C3,CFB,CFH	3
Glomerular Injury,Renal Inflammation,Renal Nephritis	Membranoproliferative glomerulonephritis type 2	0.00014	C3,CFH,CFHR5	3
Renal Inflammation,Renal Nephritis	Hereditary nephritis	0.000141	ACE,AGT,C3,CFH,CFHR5,COL4A1,COL4A3,FN1	8
Renal Enlargement	Hypertrophy of mesangial cells	0.000147	AGT,CAT,MAPK1,PARK7,PDGFRB,TGFB1	6
Cardiac Arrythmia	Arrhythmogenic right ventricular cardiomyopathy	0.000149	ACTN2,CDH2,DES,FHL2,LAMA4,LMNA,PLEC,PRKAR1A,TPM1,TUBB3	10
Renal Damage	Injury of kidney cells	0.00016	AGT,C3,CAT,CTNNB1,GRN,ICAM1,RGMB	7
Congenital Heart Anomaly	Congenital heart disease	0.000186	ACTN2,ADAM17,ALB,BMP1,CALM1 (includes others),CDH2,COL1A1,COL1A2,CXCL12,DDB1,ELN,ENG,ENO2,F2,FBLN1,FKBP1A,FLNA,HSPG2,IL6,LOX,LRP1,LTBP1,MEGF8,MGAT1,MYH11,MYH9,MYLK,NDST1,NRP1,PDGFRA,POFUT1,PRKACA,PTK7,TGFBR3,TKT,TLL1,TPM1,TUBA1C,TUBB,TUBB3,YWHAE	41
Cardiac Fibrosis	Interstitial fibrosis of heart	0.000209	ADAM17,AGT,CAPNS1,CTSA,FSTL3,GAS6,MME,POSTN,PRDX3,PTX3,SIRPA,TIMP1	12
Glomerular Injury	Abnormal morphology of glomerular capillary	0.000212	ACTN4,APOE,ARHGDIA,CLU,COL4A3,EHD3,FBLN1	7
Glomerular Injury	Progressive glomerulopathy	0.00022	ACTN4,CLU,ICAM1,TGFB1,VCAM1	5
Kidney Failure	Acute renal allograft rejection	0.00022	B2M,FKBP1A,IMPDH2,PPP3CA,SERPINA3	5
Cardiac Inflammation	Inflammation of heart	0.000235	AGT,APOA1,B2M,CLU,FAM114A1,HMGB1,LGALS3,PPIA,SERPINE1,TGFB1,THBS2	11
Cardiac Dysfunction	Systolic dysfunction	0.000235	ACE,AGT,ANXA5,DPP4,FSTL3,ITGA5,MGAT1,MME,MYDGF,TF,TGFB1	11
Liver Inflammation/Hepatitis	Alcoholic hepatitis	0.000299	CCL2,COL3A1,CXCL1,CXCL6,FAS,GSS,GSTP1,IL6,PF4,THOP1	10
Renal Enlargement	Hypertrophy of renal glomerulus	0.000306	ADIPOQ,AGT,CAT,EHD3,ICAM1,MAPK1,PARK7,PDGFRB,TGFB1	9
Cardiac Enlargement	Ventricular hypertrophy	0.000311	ACE,ADIPOQ,AGT,APOE,CXCL12,EGFR,FKBP1A,FSTL3,GAA,GLA,IGF1,IL6,INHBA,LAMA4,MDK,MME,MMP1,MYL9,MYLK3,NT5E,PPP3CA,TPM1,TXN	23
Renal Atrophy	Atrophy of kidney	0.000351	ACE,ADAMTS1,AGA,AGT,COL4A3,DCN,EFEMP1,EGFR,LGMN,MMP2	10
Glomerular Injury	Focal segmental glomerulosclerosis	0.000351	ACTN4,APOL1,CD55,CLU,CTSL,EGFR,HUWE1,IMPDH2,MYH9,TGFB1	10
Glomerular Injury,Renal Necrosis/Cell Death	Apoptosis of mesangial cells	0.000358	APOE,BGN,CCN2,ITGB1,MAN2A1,SOD2,TGFB1	7
Cardiac Proliferation	Proliferation of heart cells	0.000365	ADAM17,ADIPOQ,AGRN,AGT,CTNNB1,CXCL12,EGFR,FAM114A1,HMOX1,HSPA5,IGF1,IL6,MAPK1,NACA,NAE1,PRKAR1A,RBP4,SERPINF1,TGFB1,TGFBR3,WNT2	21
Liver Regeneration	Liver Regeneration	0.000383	C3,C5,CTNNB1,EGFR,FAH,FGF7,HGF,HMOX1,IL1RN,IL6,MMP9,PCSK9,SULF2,TIMP3,VTN	15
Cardiac Damage	Cardiotoxicity	0.000411	ACE,ANXA1,CAT,CBR1,HPRT1,HSP90AA1,HSP90AB1,HSP90B1,TUBA1C,TUBB3	10
Cardiac Damage	Injury of heart	0.000411	ADIPOQ,AGT,ANXA1,C5,CBR1,IGF1,INHBA,MAPK1,SERPING1,TXN	10
Renal Necrosis/Cell Death	Cell viability of kidney cell lines	0.000417	ANXA5,APEX1,APP,CTNNB1,EZR,FUT8,HGF,HNRNPK,HNRNPU,HSP90B1,HYOU1,KPNB1,MGAT1,NOMO1 (includes others),PPIA,PRDX2,PRNP,UFM1,USP14	19
Liver Hemorrhaging	Bleeding of liver	0.000429	F11,FAS,FGA,FKBP1A,IL1RN,KRT18,KRT8,TLL1	8
Cardiac Enlargement	Right ventricular dilatation	0.000456	CRK,DES,FKBP1A,GAA,HMOX1,IGF2R,SOD2	7
Cardiac Arrythmia	Inherited arrhythmia syndrome	0.000483	ACTN2,CALM1 (includes others),COL5A1,FBN1,FLNA,FLNC,LAMA4,LAMC1,LMNA,MYH11,TPM1,TTR,VCL	13
Liver Failure	Failure of liver	0.000483	ADAM17,ALB,FAH,FAS,FKBP1A,GSS,HGF,HMOX1,IL6,KNG1,PPP3CA,TIMP1,TIMP3	13
Increased Levels of Blood Urea Nitrogen	Increased Levels of Blood Urea Nitrogen	0.000522	AGT,C3,C4A/C4B,C5,CD44,CFB,PARP1,TGFB1	8
Glomerular Injury	Fusion of pedicels	0.000539	ADIPOQ,ITGB1,LAMB2	3
Cardiac Pulmonary Embolism	Acute deep vein thrombosis with pulmonary embolism	0.000539	F10,F2,SERPINC1	3
Cardiac Arrythmia	Atrial fibrillation with embolism	0.000539	F10,F2,SERPINC1	3
Glomerular Injury,Renal Inflammation,Renal Nephritis	Progressive crescentic glomerulonephritis	0.000539	ACTN4,ICAM1,VCAM1	3
Cardiac Pulmonary Embolism	Postoperative pulmonary embolism	0.000539	F10,F2,SERPINC1	3
Cardiac Fibrosis	Fibrosis of heart chamber	0.000644	AGT,APOA1,CTNNA1,CTSA,GAS6,MME,PRDX3,PSMB8,PTX3,TGFB1	10
Renal Dysfunction	Dysfunction of kidney	0.000716	ACE,AGT,BSG,C3,PARP1,PPP3CA,VWF	7
Renal Necrosis/Cell Death	Survival of glomerular cells	0.00073	FAS,FAT1,HGF,IGF1,PPP3CA	5
Cardiac Infarction	Acute ST-elevation myocardial infarction	0.00073	F10,F2,GSS,PLG,SERPINC1	5
Cardiac Damage	Rupture of heart	0.000742	BGN,MMP9,POSTN,SERPINE1	4
Glomerular Injury,Renal Thrombosis	Thrombosis of renal glomerulus	0.000742	APOE,C1QA,C2,CFB	4
Liver Inflammation/Hepatitis	Chronic hepatitis	0.000814	ADIPOQ,APOA2,CCL2,COL3A1,CSF1,FKBP1A,FNTA,GAA,HGF,HPRT1,HSP90B1,HSPA5,IGF1,IL6,IMPDH2,MMP9,PPIA,PPP3CA,S100A4,TGFB1,THOP1,TIMP1	22
Cardiac Proliferation	Proliferation of cardiac fibroblasts	0.000884	ADIPOQ,AGT,CXCL12,FAM114A1,IGF1,SERPINF1,TGFB1	7
Liver Hyperplasia/Hyperproliferation	Small cell undifferentiated hepatoblastoma	0.000917	HSP90AA1,HSP90AB1,HSP90B1,TOP1,TUBA1C,TUBB3	6
Cardiac Infarction	Recurrent myocardial infarction	0.00102	ACE,F10,F2,NNMT,SERPINC1	5
Cardiac Fibrosis	Perivascular fibrosis	0.00108	ADAM17,AGT,BGN,GAS6,HMOX1,SIRPA,TIMP1,TNC	8
Hepatocellular carcinoma,Liver Hyperplasia/Hyperproliferation	Recurrent hepatocellular carcinoma	0.00108	BSG,HNRNPAB,HSP90AA1,HSP90AB1,HSP90B1,IMPDH2,PDGFRA	7
Cardiac Dilation,Cardiac Enlargement	Primary dilated cardiomyopathy	0.00109	ACTN2,DES,FHL2,FLNC,IL6,LAMA2,LAMA4,LMNA,PGK1,PTGDS,SOD2,TGFB1,TPI1,TPM1,TXNRD2,VCL	16
Liver Cirrhosis,Liver Fibrosis	Compensated cirrhosis	0.00119	APOA1,APOA2,IMPDH2,TF	4
Cardiac Infarction	ST-elevation myocardial infarction	0.00126	F10,F2,F9,GSS,ITGAV,PLG,PTX3,SERPINC1,SERPINE1,TUBA1C,TUBB,TUBB3,VWF	13
Liver Inflammation/Hepatitis	Acute hepatitis	0.00127	CD44,COL3A1,CSF1,HGF,IMPDH2,MMP2,MMP9,NAGLU	8
Cardiac Inflammation	Myocarditis	0.00127	ADIPOQ,CCL2,CLU,HPRT1,IGHM,IMPDH2,MME,MMP2,MMP9,TGFB1	10
Decreased Levels of Albumin	Decreased synthesis of albumin	0.0013	ALB,IL6,TGFB1	3
Liver Hyperplasia/Hyperproliferation	Resectable liver cholangiocarcinoma	0.0013	HSP90AA1,HSP90AB1,HSP90B1	3
Renal Damage,Renal Tubule Injury	Injury of tubular cells	0.0013	CAT,ICAM1,RGMB	3
Cardiac Necrosis/Cell Death	Survival of ventricular myocytes	0.00138	ADIPOQ,CALR,CTH,IGF1,LRP1	5
Congenital Heart Anomaly	Atrial or ventricular septal defect	0.0014	ADAM17,BMP1,CXCL12,ELN,FBLN1,FKBP1A,FLNA,LTBP1,MEGF8,MYH9,MYLK,PDGFRA,TGFBR3,TLL1,TPM1,TUBA1C,TUBB,TUBB3,YWHAE	19
Cardiac Dysfunction,Cardiac Enlargement	Hypertrophy of left ventricle	0.00168	ACE,ADIPOQ,AGT,EGFR,FKBP1A,GAA,GLA,LAMA4,MDK,MME,MMP1,MYLK3,NT5E,PPP3CA,TPM1	15
Cardiac Arteriopathy	Spontaneous coronary artery disease	0.00179	ACE,APOE,F10,LRP1	4
Renal Proliferation	Proliferation of tubular cells	0.00183	AGT,CSF1,EGFR,HGF,TGFB1	5
Cardiac Inflammation	Pericarditis	0.00183	IL1RN,MME,TGFB1,TUBA1C,TUBB,TUBB3	6
Liver Inflammation/Hepatitis	Chronic active hepatitis	0.00188	COL3A1,FKBP1A,HPRT1,IMPDH2,PPIA,PPP3CA,TGFB1	7
Cardiac Dilation,Cardiac Enlargement	Dominant dilated cardiomyopathy	0.00224	ACTN2,DES,FLNC,LAMA4,LMNA,TPM1,VCL	7
Liver Hyperplasia/Hyperproliferation	Metastatic liver cancer	0.00232	BSG,EGFR,HSP90AA1,HSP90AB1,HSP90B1,PDGFRA,PDGFRB,TOP1,TUBA1C,TUBB3	10
Liver Hyperplasia/Hyperproliferation	Autosomal dominant polycystic liver disease	0.00238	CTNNB1,DKK3,GANAB,PRKCSH,RUVBL1	5
Cardiac Dysfunction,Cardiac Fibrosis	Interstitial fibrosis of left ventricle	0.00238	CTSA,GAS6,MME,PRDX3,PTX3	5
Increased Levels of Potassium	Increased excretion of K+	0.00238	ADAMTS1,AGT,AKR1B1,GRN,TGFB1	5
Liver Adhesion	Adhesion of hepatocytes	0.00249	ICAM1,KRT8,VCAM1	3
Cardiac Fibrosis	Interstitial fibrosis of myocardium	0.00249	ADAM17,AGT,TIMP1	3
Renal Damage	Ischemia/reperfusion-induced acute kidney injury	0.00249	AKR1A1,PKM,RGMB	3
Glomerular Injury,Renal Inflammation,Renal Nephritis	Spontaneous lupus nephritis	0.00249	APCS,PTGDS,VCAM1	3
Liver Steatosis	Nonalcoholic fatty liver disease	0.0025	ACE,ACLY,ADIPOQ,AGT,AHNAK,AHSA1,APOB,APOE,BCAT1,CAT,CCL2,DAG1,DPP4,EGFR,EIF4A3,FABP5,FASN,HNRNPU,LGALS3,LTA4H,PXDN,S100A4,SOD1,TKT,WNT2	25
Nephrosis	Steroid dependent nephrotic syndrome	0.00257	C3,C4A/C4B,C5,IMPDH2	4
Renal Atrophy	Atrophy of renal cortex	0.00257	ACE,ADAMTS1,AGT,LGMN	4
Liver Hyperplasia/Hyperproliferation	Beta-catenin activating mutation positive hepatocellular adenoma	0.0027	CTNNB1,GLUL	2
Glomerular Injury,Kidney Failure,Renal Inflammation,Renal Nephritis	Susceptibility to progression to renal failure in IgA nephropathy	0.0027	ACE,AGT	2
Liver Cirrhosis	Experimentally induced cirrhosis	0.0027	FBLN1,FBLN2	2
Cardiac Thrombosis	Left atrial appendage thrombosis	0.0027	F10,F2	2
Liver Hyperplasia/Hyperproliferation	Nodular hyperplasia of liver	0.0027	SERPINC1,SOD1	2
Liver Inflammation/Hepatitis	Susceptibility to hepatitis C virus	0.0027	KRT18,KRT8	2
Cardiac Damage	Rupture of heart ventricle	0.0027	BGN,POSTN	2
Cardiac Dysfunction	Left ventricular thrombosis	0.0027	F10,F9	2
Liver Fibrosis,Liver Proliferation	Proliferation of hepatic stellate cells/myofibroblasts	0.0027	CTSB,SMPD1	2
Liver Inflammation/Hepatitis	Persistent chronic hepatitis	0.0027	CSF1,THOP1	2
Renal Necrosis/Cell Death	Cell death of proximal tubule cells	0.00303	AGT,ALB,CAT,EGFR,IGF1	5
Glomerular Injury,Renal Inflammation,Renal Nephritis	Crescentic glomerulonephritis	0.00303	ACTN4,EGFR,ICAM1,IL1RN,VCAM1	5
Cardiac Arrythmia	Hereditary Wolff-Parkinson-White syndrome	0.00308	ACTN2,FLNA,FLNC,LAMA4,LAMC1,LMNA,MYH11,VCL	8
Renal Necrosis/Cell Death	Cell death of renal tubular epithelial cells	0.00309	AGT,CLU,DCN,HGF,ICAM1,IGF1,PKM	7
Cardiac Infarction	Non-ST elevation myocardial infarction	0.00309	F10,F2,F9,SERPINC1,TUBA1C,TUBB,TUBB3	7
Liver Inflammation/Hepatitis	Chronic hepatitis C	0.00315	ADIPOQ,CCL2,CSF1,GAA,HSPA5,IGF1,IL6,IMPDH2,PPIA,PPP3CA,S100A4,TGFB1	12
Renal Hyperplasia/Hyperproliferation	Hyperplasia of kidney	0.00331	BSG,CFH,CLU,COL4A3,HGF,LGMN	6
Cardiac Enlargement	Hypertrophy of myocardium	0.00356	ADAM17,AGT,IL6,PPP3CA	4
Hepatocellular carcinoma,Liver Hyperplasia/Hyperproliferation	Size of hepatocellular carcinoma	0.00356	ADH5,FAS,IQGAP1,SULF2	4
Cardiac Pulmonary Embolism	Acute pulmonary embolism	0.00356	F10,F2,PLG,SERPINC1	4
Liver Cirrhosis,Liver Fibrosis	Decompensated cirrhosis of liver	0.00356	ALB,APOA1,APOA2,IMPDH2	4
Renal Dilation	Dilation of renal tubule	0.00356	ARHGDIA,BGN,EGFR,PRKCSH	4
Cardiac Proliferation	Proliferation of cardiomyocytes	0.00365	ADAM17,AGRN,AGT,CTNNB1,EGFR,HMOX1,HSPA5,IGF1,IL6,MAPK1,NACA,NAE1,PRKAR1A,RBP4,TGFBR3,WNT2	16
Increased Levels of Red Blood Cells	Increased Levels of Red Blood Cells	0.00383	B4GALT1,CD59,CIAPIN1,CLEC11A,DNASE2,HGF,HMOX1,INHBA,KITLG,LAMA4,LGMN,PICALM,SOD1,TWSG1	14
Congenital Heart Anomaly	Ventricular septal defect	0.00386	ADAM17,BMP1,CXCL12,ELN,FBLN1,FKBP1A,FLNA,LTBP1,MEGF8,MYH9,PDGFRA,TGFBR3,TLL1,TUBA1C,TUBB,TUBB3,YWHAE	17
Liver Enlargement	Hepatomegaly	0.00399	ADIPOQ,BPNT1,CTNNB1,CTSA,GBA1,HGF,HSD17B4,IGF2R,KRT18,LMNA,MIF,SIRPA,SMPD1	13
Cardiac Fibrosis	Fibrosis of heart ventricle	0.004	AGT,APOA1,CTNNA1,CTSA,GAS6,MME,PRDX3,PTX3	8
Increased Levels of Albumin	Increased excretion of albumin	0.00419	AGT,DPP4,ICAM1	3
Cardiac Fibrosis	Myocardial fibrosis	0.00469	ACE,AGT,FN1,GLO1,GSN,SERPINE1	6
Hepatocellular carcinoma,Liver Hyperplasia/Hyperproliferation	Primary hepatocellular carcinoma	0.00469	ADAM10,FASN,ILF2,ILF3,PDGFRA,PDGFRB	6
Cardiac Thrombosis	Thrombosis of heart	0.00478	F10,F2,SERPINC1,TGFB1	4
Cardiac Dysfunction,Cardiac Fibrosis	Left ventricular fibrosis	0.00481	AGT,APOA1,CTSA,GAS6,MME,PRDX3,PTX3	7
Renal Damage	Damage of nephron	0.00512	AGT,B2M,C3,CAT,CTNNB1,FKBP1A,GRN,THY1	8
Liver Inflammation/Hepatitis	Chronic viral hepatitis	0.00542	ADIPOQ,CCL2,CSF1,FNTA,GAA,HSP90B1,HSPA5,IGF1,IL6,IMPDH2,MMP9,PPIA,PPP3CA,S100A4,TGFB1,TIMP1	16
Cardiac Pulmonary Embolism	Pulmonary embolism	0.00552	F10,F2,F9,PLG,SERPINC1,TFPI	6
Cardiac Necrosis/Cell Death	Cell death of ventricular myocytes	0.00576	ADIPOQ,AGT,CAT,FSTL1,MANF,MMP2,RTN4,TIMP2	8
Increased Levels of ALT	Increased Levels of ALT	0.00576	APOE,C1QA,C3,C5,IL6,KNG1,PLG,SMPD1	8
Cardiac Arrythmia,Tachycardia	Catecholaminergic polymorphic ventricular tachycardia type 1	0.00626	CALM1 (includes others),LAMA4,LMNA,TPM1	4
Cardiac Infarction	Susceptibility to myocardial infarction	0.00626	ACE,APOC3,CCT7,PSMA6	4
Cardiac Dysfunction	Left ventricular noncompaction	0.0063	ACTN2,DES,FHL2,LAMA4,LMNA,TPM1,VCL	7
Glomerular Injury,Renal Inflammation,Renal Nephritis	Acute phase crescentic glomerulonephritis	0.00645	ACTN4,ICAM1,VCAM1	3
Cardiac Dilation,Cardiac Enlargement	Idiopathic dilated cardiomyopathy	0.00646	IL6,PGK1,PTGDS,SOD2,TGFB1,TPI1	6
Liver Inflammation/Hepatitis	Infection by hepatitis B virus	0.00667	AP2A1,C3,C4A/C4B,C5,CCL2,CSF1,EGFR,HSP90B1,IL6,IMPDH2,TGFB1,TIMP1	12
Renal Degeneration	Degeneration of kidney	0.007	ARHGDIA,CLU,FAH,MDK,TGFB1	5
Glutathione Depletion In Liver,Liver Fibrosis	Production of reactive oxygen species in liver	0.007	CAT,LRP1,SMPD1,TGFB1,UBQLN1	5
Hepatocellular carcinoma,Liver Hyperplasia/Hyperproliferation	Metastatic hepatocellular carcinoma	0.0075	BSG,HSP90AA1,HSP90AB1,HSP90B1,PDGFRA,PDGFRB	6
Liver Hyperplasia/Hyperproliferation	Growth of liver tumor	0.00777	ADIPOQ,CTNNB1,EHD2,FH,FN1,GSTP1,IDH1,IL6,MME,PLXNB2,RBMX,S100A6,TGFB1,THBS1	14
Liver Adhesion	Adhesion of hepatic stellate cells	0.00782	ADAM12,CCN2	2
Glomerular Injury	Glomerular cyst	0.00782	CTNNB1,LGMN	2
Cardiac Pulmonary Embolism	Symptomatic stage acute deep vein thrombosis with pulmonary embolism	0.00782	F10,F2	2
Glomerular Injury	Lack of podocytes	0.00782	ARHGDIA,PDGFRB	2
Liver Steatosis	Experimental nonalcoholic fatty liver disease	0.00782	ADIPOQ,EGFR	2
Renal Necrosis/Cell Death	Apoptosis of proximal tubule epithelial cells	0.00782	AGT,IGF1	2
Liver Cirrhosis,Liver Fibrosis	Cryptogenic cirrhosis	0.00782	KRT18,KRT8	2
Cardiac Damage	Reperfusion injury of myocardium	0.00782	ADIPOQ,SERPING1	2
Glomerular Injury,Renal Inflammation,Renal Nephritis	Idiopathic membranous nephropathy	0.00801	FKBP1A,IMPDH2,PPIA,PPP3CA	4
Glomerular Injury	Expansion of mesangial matrix	0.00801	AGT,B4GALT1,COL4A3,ICAM1	4
Renal Hyperplasia/Hyperproliferation	Hyperplasia of kidney cells	0.00838	BSG,CFH,CLU,COL4A3,LGMN	5
Hepatocellular carcinoma,Liver Hyperplasia/Hyperproliferation	Unresectable hepatocellular carcinoma	0.00895	AXL,BSG,CA12,HSP90AA1,HSP90AB1,HSP90B1,PDGFRA,PDGFRB	8
Cardiac Arteriopathy,Cardiac Fibrosis	Fibrosis of coronary artery	0.0093	AGT,BGN,SERPINE1	3
Decreased Levels of Albumin	Decreased localization of albumin	0.0093	CD55,COL2A1,LGALS3	3
Cardiac Arteriopathy	Spontaneous coronary artery dissection	0.0093	ACE,F10,LRP1	3
Renal Necrosis/Cell Death	Apoptosis of proximal tubule cells	0.01	AGT,ALB,EGFR,IGF1	4
Increased Levels of ALT	Increased localization of ALT	0.0114	APOE,C1QA,C5,IL6,KNG1,SMPD1	6
Increased Levels of Potassium	Increased Levels of Potassium	0.0114	ADAMTS1,AGT,AKR1B1,GRN,MAPK1,TGFB1	6
Glomerular Injury,Renal Damage	Damage of renal glomerulus	0.0115	AGT,B2M,C3,CTNNB1,FKBP1A,GRN,THY1	7
Cardiac Fibrosis	Fibrosis of atrium	0.0128	AGT,PSMB8,TGFB1	3
Liver Hyperplasia/Hyperproliferation	Locally advanced liver cholangiocarcinoma	0.0128	HSP90AA1,HSP90AB1,HSP90B1	3
Renal Necrosis/Cell Death	Survival of podocytes	0.0128	FAT1,HGF,IGF1	3
Congenital Heart Anomaly	Atrial septal defect	0.0133	ELN,FBLN1,FLNA,LTBP1,MEGF8,MYLK,TLL1,TPM1	8
Liver Inflammation/Hepatitis	Chronic autoimmune hepatitis	0.0136	FKBP1A,HPRT1,IMPDH2,PPIA,PPP3CA	5
Glomerular Injury,Renal Damage	Injury of renal glomerulus	0.0146	AGT,B2M,C3,CTNNB1,FKBP1A,GRN	6
Glomerular Injury,Renal Damage	Injury of podocytes	0.0151	AGT,C3,CTNNB1,GRN	4
Renal Damage	Ischemic acute kidney injury	0.0151	AKR1A1,HMOX1,PKM,RGMB	4
Liver Damage	Chronic hepatic injury	0.0151	IL6,IL6ST	2
Decreased Levels of Albumin	Decreased secretion of albumin	0.0151	IL6,TGFB1	2
Glomerular Injury,Renal Inflammation,Renal Nephritis	Inflammation of renal glomerulus	0.0151	CFB,HGF	2
Cardiac Necrosis/Cell Death	Apoptosis of cardiac stem cells	0.0151	CTNNB1,SFRP2	2
Cardiac Stress Response	Oxidative stress response of myocardium	0.0151	AGT,TXN	2
Renal Dysplasia	Autosomal recessive renal tubular dysgenesis	0.0151	ACE,AGT	2
Renal Proliferation	Expansion of mesangial cells	0.0151	SERPINB7,TGFB1	2
Glomerular Injury	Bleeding of renal glomerulus	0.0151	COL4A3,PDGFRB	2
Renal Degeneration	Degeneration of renal tubule	0.0151	ARHGDIA,MDK	2
Renal Hypoplasia	Hypoplasia of renal cortex	0.0151	FGF7,MMP14	2
Cardiac Fibrosis	Perivascular fibrosis of heart	0.0158	AGT,BGN,GAS6,SIRPA,TNC	5
Liver Hyperplasia/Hyperproliferation	Metastatic liver cholangiocarcinoma	0.0158	EGFR,HSP90AA1,HSP90AB1,HSP90B1,PDGFRB,TUBA1C,TUBB3	7
Renal Inflammation,Renal Nephritis	Collagen type IV inherited nephropathy	0.0169	COL4A1,COL4A3,FN1	3
Liver Cholestasis	Cholestasis	0.0179	AKR1C3,ALB,APOA1,BLVRA,C3,CTNNB1,FAS,HGF,HPX,IL6,LIPA,LPA,UGP2	13
Cardiac Dilation,Cardiac Enlargement	Familial primary dilated cardiomyopathy	0.0185	ACTN2,DES,FLNC,LMNA,TPM1,VCL	6
Cardiac Congestive Cardiac Failure,Heart Failure	Congestive heart failure	0.0195	ACE,ADIPOQ,AGT,BMP1,CA12,DES,DPP4,FKBP1A,GSS,IDUA,IGF2R,IL6,MME,MYLK3,TIMP3,TLL1	16
Increased Levels of Alkaline Phosphatase	Increased activation of alkaline phosphatase	0.0199	ANXA6,APP,CCN2,IGF1,IGFBP5,IL6,LDLR,MGAT5,PLAUR,POSTN,TGFB1,TNFRSF11B	12
Cardiac Arrythmia	Familial ventricular arrhythmia	0.0207	CALM1 (includes others),LAMA4,LMNA,TPM1,VCL	5
Cardiac Arrythmia	Inherited primary arrhythmia syndrome	0.0212	CALM1 (includes others),COL5A1,FBN1,LAMA4,LMNA,TPM1,TTR	7
Liver Failure	Acute liver failure	0.0214	ALB,GSS,HGF,KNG1	4
Cardiac Dilation,Cardiac Enlargement	Dilated cardiomyopathy 1S	0.0217	DES,LMNA,VCL	3
Liver Hyperplasia/Hyperproliferation	Growth of liver cholangiocarcinoma	0.0225	FH,FN1,GSTP1,IDH1,MME,PLXNB2,RBMX,THBS1	8
Increased Levels of Albumin	Increased Levels of Albumin	0.0229	AGT,APP,B2M,DPP4,ICAM1,THBS1	6
Liver Steatosis	Macrovesicular hepatic steatosis	0.0236	ADIPOQ,CTHRC1,FSTL3,LDLR,MACROH2A1	5
Renal Proliferation	Proliferation of proximal tubule cells	0.0243	AGT,EGFR	2
Nephrosis	Finnish congenital nephrotic syndrome	0.0243	ARHGDIA,FAT1	2
Renal Necrosis/Cell Death	Survival of mesangial cells	0.0243	FAS,PPP3CA	2
Cardiac Stenosis	Stenosis of pulmonary artery	0.0243	ELN,IGFBP7	2
Kidney Failure	Nephrotoxic acute renal failure	0.0243	HEXB,HMOX1	2
Liver Regeneration	Delay in regeneration of liver	0.0243	EGFR,SULF2	2
Liver Necrosis/Cell Death	Apoptosis of oval cells	0.0243	HGF,TGFB1	2
Renal Dilation	Dilation of collecting tubule	0.0243	ARHGDIA,PRKCSH	2
Cardiac Proliferation	Proliferation of ventricular myocytes	0.0251	AGT,EGFR,HSPA5,IGF1	4
Glomerular Injury,Renal Hyperplasia/Hyperproliferation	Hyperplasia of mesangial cells	0.0251	BSG,CFH,CLU,COL4A3	4
Cardiac Necrosis/Cell Death	Apoptosis of ventricular myocytes	0.0254	ADIPOQ,CAT,FSTL1,MMP2,RTN4,TIMP2	6
Liver Hyperplasia/Hyperproliferation	Benign neoplasm of liver	0.0254	CTNNB1,FAH,GLUL,HGF,IL6ST,MAPK1	6
Glomerular Injury,Renal Necrosis/Cell Death	Apoptosis of podocytes	0.0254	AGT,CTNNB1,LAMB2,PKM,PPP3CA,TGFB1	6
Renal Necrosis/Cell Death	Apoptosis of renal tubular epithelial cells	0.0266	AGT,CLU,DCN,HGF,IGF1	5
Cardiac Thrombosis	Thrombosis of atrium	0.0271	F10,F2,TGFB1	3
Renal Dilation	Dilation of kidney	0.0271	AGT,MMP9,PRKCSH	3
Liver Inflammation/Hepatitis	Chronic phase hepatitis	0.0352	HLA-A,IMPDH2	2
Decreased Levels of Albumin	Decreased activation of albumin	0.0352	ALB,UBA2	2
Cardiac Dilation,Cardiac Enlargement	Peripartum cardiomyopathy	0.0352	F10,F9	2
Heart Failure	Symptomatic stage heart failure	0.0352	ACE,MME	2
Liver Damage	Drug-induced hepatotoxicity	0.0352	FAS,GSS	2
Glomerular Injury,Renal Inflammation,Renal Nephritis	Stage III lupus nephritis	0.0352	FKBP1A,PPP3CA	2
Hepatocellular carcinoma,Liver Hyperplasia/Hyperproliferation	Combined hepatocellular carcinoma and cholangiocarcinoma	0.0352	CTNNB1,IDH1	2
Glomerular Injury,Renal Inflammation,Renal Nephritis	Stage V lupus nephritis	0.0352	FKBP1A,PPP3CA	2
Cardiac Necrosis/Cell Death	Quantity of apoptotic cardiomyocytes	0.0352	APOA1,MMP2	2
Glomerular Injury,Renal Inflammation,Renal Nephritis	Stage IV lupus nephritis	0.0352	FKBP1A,PPP3CA	2
Cardiac Arteriopathy,Cardiac Fibrosis	Perivascular fibrosis of coronary artery	0.0352	AGT,BGN	2
Liver Enlargement	Hepatosplenomegaly	0.0352	LIPA,SMPD1	2
Cardiac Arteriopathy	Multi vessel coronary artery disease	0.0352	F10,F9	2
Glomerular Injury,Renal Inflammation,Renal Nephritis	Lupus nephritis	0.0369	ACTN4,APCS,C3,FAS,FKBP1A,HPRT1,ICAM1,IMPDH2,LTBP1,PPIA,PPP3CA,PSMB1,PSMB2,PSMB5,PSMD1,PSMD2,PTGDS,S100A10,VCAM1	19
Cardiac Dilation	Dilation of heart ventricle	0.0373	CAST,LMNA,MMP9,PRDX3,SERPINF2	5
Liver Hyperbilirubinemia	Hyperbilirubinemia	0.0385	C3,C4A/C4B,C5,GSTP1	4
Decreased Levels of Albumin	Decreased excretion of albumin	0.0399	C3,IL1RN,LAMB2	3
Cardiac Arteriopathy	Abnormal morphology of coronary artery	0.0399	APOE,IL1RN,LTBP1	3
Hepatocellular carcinoma,Liver Hyperplasia/Hyperproliferation	Progression of hepatocellular carcinoma	0.0399	CCN2,EGFR,HGF	3
Cardiac Dilation,Cardiac Enlargement	Familial dilated cardiomyopathy	0.0406	ACTN2,DES,FLNC,GLA,LAMA4,LMNA,TPM1,VCL	8
Hepatocellular carcinoma,Liver Hyperplasia/Hyperproliferation	Advanced hepatocellular carcinoma	0.0413	AXL,BSG,HSP90AA1,HSP90AB1,HSP90B1,PDGFRA,PDGFRB	7
Cardiac Hypoplasia	Hypoplasia of trabeculae carne	0.0413	CALR,ITGAV,RBP4,TGFBR3,TXNRD2	5
Degeneration of liver	Degeneration of liver	0.0413	AXL,EFEMP1,IL6,SERPINC1,XRCC5	5
Renal Hypoplasia	Hypoplasia of kidney	0.0434	ACE,ARHGAP1,ARHGDIA,FGF7,GFRA1,LAMC1,MMP14,SLIT3	8
Glomerular Injury,Renal Fibrosis	Fibrosis of kidney component	0.0436	CLU,COL4A3,CTSK,FH	4
Cardiac Dysfunction	Familial left ventricular noncompaction	0.0436	ACTN2,DES,LMNA,TPM1	4
Liver Cirrhosis	Advanced stage cirrhosis	0.0476	ALB,COL3A1	2
Renal Dilation	Vasodilation of kidney	0.0476	AGT,MMP9	2
Renal Damage	Damage of renal cortex	0.0476	CAT,GC	2
Cardiac Proliferation	Proliferation of adventitial fibroblasts	0.0476	ADIPOQ,TGFB1	2
Kidney Failure	Chronic lung allograft dysfunction	0.0476	PPIA,PPP3CA	2
Liver Inflammation/Hepatitis	Acute hepatitis C	0.0476	CSF1,IMPDH2	2
Cardiac Damage,Cardiac Degeneration	Injury of cardiomyocytes	0.0476	MAPK1,TXN	2
Renal Regeneration	Regeneration of kidney	0.0476	HGF,THY1	2
Cardiac Arteriopathy	Early-onset premature coronary artery disease	0.0476	APOA1,LDLR	2
Renal Inflammation,Renal Nephritis	Immune complex nephritis	0.0476	FAS,IL1RN	2
Cardiac Dilation	Dilation of left ventricle	0.0492	CAST,LMNA,MMP9,PRDX3	4
Renal Transformation	Transformation of renal tubular epithelial cells	0.052	TGFB1	1
Congenital Heart Anomaly	Atrial septal defect type 6	0.052	TLL1	1
Cardiac Dysfunction	Asymptomatic stage left ventricular dysfunction	0.052	ACE	1
Renal Dilation	Dilation of proximal convoluted tubule	0.052	BGN	1
Cardiac Dysfunction	Left ventricular noncompaction type 9	0.052	TPM1	1
Glomerular Injury	Lipoprotein glomerulopathy	0.052	APOE	1
Glomerular Injury	Hypertension of renal glomerulus	0.052	AGT	1
Cardiac Arrythmia,Congenital Heart Anomaly	Long QT syndrome type 16	0.052	CALM1 (includes others)	1
Liver Inflammation/Hepatitis	Inflammation of liver lobule	0.052	IL6	1
Congenital Heart Anomaly	Agenesis of corpus callosum, cardiac, ocular, and genital syndrome	0.052	CDH2	1
Liver Fibrosis	Opisthorchiasis periductal fibrosis	0.052	IL6	1
Renal Dilation	Dilation of glomerular capsule	0.052	BGN	1
Liver Inflammation/Hepatitis	Persistent chronic hepatitis B	0.052	CSF1	1
Cardiac Damage	Rupture of left ventricle	0.052	BGN	1
Cardiac Arrythmia	Familial arrhythmogenic right ventricular dysplasia type 14	0.052	CDH2	1
Renal Inflammation,Renal Nephritis	Idiopathic interstitial nephritis	0.052	ALB	1
Liver Cirrhosis,Liver Fibrosis	Hepatitis D virus-related liver cirrhosis	0.052	CHI3L1	1
Liver Steatosis	Methionine choline-deficient diet induced nonalcoholic fatty liver disease	0.052	EGFR	1
Increased Levels of Albumin	Increased secretion of albumin	0.052	APP	1
Increased Levels of Albumin	Increased flux of albumin	0.052	THBS1	1
Liver Cirrhosis,Liver Fibrosis	Susceptibility to noncryptogenic cirrhosis	0.052	KRT18	1
Congenital Heart Anomaly	Cardiac valvular form autosomal recessive Ehlers-Danlos syndrome	0.052	COL1A2	1
Liver Cirrhosis,Liver Fibrosis	Stage III primary biliary cirrhosis	0.052	COL3A1	1
Renal Hyperplasia/Hyperproliferation	Hyperplasia of proximal tubule cells	0.052	LGMN	1
Liver Hyperplasia/Hyperproliferation	Cancer of hepatocytes	0.052	TIMP1	1
Glomerular Injury,Renal Damage,Renal Destruction	Destruction of glomerular capillary	0.052	THY1	1
Liver Hyperplasia/Hyperproliferation	Formation of liver metastasis	0.052	ACTN4	1
Liver Hyperplasia/Hyperproliferation	Polycystic kidney disease 3 with polycystic liver disease	0.052	GANAB	1
Cardiac Arteriopathy	Development of coronary artery disease in HIV	0.052	CCL2	1
Liver Degradation	Fragmentation of hepatocytes	0.052	TGFB1	1
Cardiac Stenosis	Autosomal dominant supravalvular aortic stenosis	0.052	ELN	1
Cardiac Dilation,Cardiac Enlargement	Dilated cardiomyopathy 1i	0.052	DES	1
Glomerular Injury,Renal Inflammation,Renal Nephritis	Idiopathic immune-complex membranoproliferative glomerulonephritis	0.052	C3	1
Cardiac Dilation,Cardiac Enlargement	Nonfamilial idiopathic dialated cardiomyopathy	0.052	SOD2	1
Renal Inflammation,Renal Nephritis	Advanced nephritis	0.052	TGFB1	1
Cardiac Dilation,Cardiac Enlargement	Dilated cardiomyopathy 1w	0.052	VCL	1
Glomerular Injury	Glomerular hypertension	0.052	FLNA	1
Cardiac Stenosis	Retinal arterial macroaneurysm with supravalvular pulmonic stenosis	0.052	IGFBP7	1
Glomerular Injury	Autosomal dominant focal segmental glomerulosclerosis	0.052	ACTN4	1
Nephrosis	Nephrotic syndrome type 5 without ocular abnormalities	0.052	LAMB2	1
Nephrosis	Pierson syndrome	0.052	LAMB2	1
Glomerular Injury,Renal Inflammation,Renal Nephritis	Severe glomerulonephritis	0.052	COL4A3	1
Liver Hyperplasia/Hyperproliferation	Delay in hyperplasia of hepatocytes	0.052	C3	1
Nephrosis	Nephrotic syndrome type 5 with ocular abnormalities	0.052	LAMB2	1
Cardiac Enlargement	Aortic banding-induced cardiac hypertrophy	0.052	ADAMTS2	1
Cardiac Necrosis/Cell Death	Quantity of apoptotic ventricular myocytes	0.052	MMP2	1
Liver Hyperplasia/Hyperproliferation	Well-differentiated liver cholangiocarcinoma	0.052	CDH2	1
Nephrosis	Nephrotic syndrome type 8	0.052	ARHGDIA	1
Liver Cirrhosis,Liver Fibrosis	Stage IV primary biliary cirrhosis	0.052	COL3A1	1
Liver Hyperplasia/Hyperproliferation	Inhibition of liver metastasis	0.052	CCL2	1
Liver Inflammation/Hepatitis	Necroinflammatory liver disease	0.052	ADIPOQ	1
Renal Degradation	Degradation of renal tubule	0.052	PSAP	1
Cardiac Regeneration	Regeneration of cardiomyocytes	0.052	HMGB1	1
Renal Damage,Renal Tubule Injury	Injury of renal tubular epithelium	0.052	RGMB	1
Cardiac Arrythmia,Congenital Heart Anomaly	Long QT syndrome type 15	0.052	CALM1 (includes others)	1
Cardiac Arrythmia,Tachycardia	Catecholaminergic polymorphic ventricular tachycardia type 4	0.052	CALM1 (includes others)	1
Cardiac Fibrosis	Fibrosis of right ventricle	0.052	CTNNA1	1
Liver Inflammation/Hepatitis,Liver Steatosis	Experimental nonalcoholic steatohepatitis	0.052	ADIPOQ	1
Kidney Failure	Delay in renal failure	0.052	CFB	1
Renal Inflammation,Renal Nephritis	Hereditary angiopathy with nephropathy, aneurysms, and muscle cramps	0.052	COL4A1	1
Kidney Failure	Nondiabetic end-stage renal disease	0.052	MYH9	1
Glomerular Injury	Susceptibility to focal segmental glomerulosclerosis type 4	0.052	APOL1	1
Cardiac Arrythmia,Congenital Heart Anomaly	Long QT syndrome type 14	0.052	CALM1 (includes others)	1
Glomerular Injury	Glomerulopathy with fibronectin deposits type 2	0.052	FN1	1
Renal Lysis	Cytolysis of mesangial cells	0.052	THY1	1
Liver Inflammation/Hepatitis	Persistent chronic hepatitis C	0.052	CSF1	1
Liver Hyperplasia/Hyperproliferation	Polycystic liver disease 1 without kidney cysts	0.052	PRKCSH	1
Cardiac Degeneration	Myocytolysis of heart	0.052	MMP9	1
Cardiac Dilation,Cardiac Enlargement	Advanced stage dilated cardiomyopathy	0.052	THBS2	1
Cardiac Dilation,Cardiac Enlargement	Dilated cardiomyopathy with hypergonadotropic hypogonadism	0.052	LMNA	1
Liver Hyperplasia/Hyperproliferation	Liver metastasis by cancer stem cells	0.052	PRNP	1
Liver Cirrhosis,Liver Fibrosis	Alpha-1 antitrypsin deficiency related emphysema-cirrhosis	0.052	SERPINA1	1
Liver Inflammation/Hepatitis,Liver Steatosis	Choline-deficient amino acid-defined high fat diet-induced nonalcoholic steatohepatitis	0.052	HNRNPU	1
Renal Proliferation	Proliferation of proximal tubule epithelial cells	0.052	AGT	1
Heart Failure	Refractory heart failure	0.052	ACE	1
Cardiac Arrythmia	T-wave inversion	0.052	VWF	1
Glomerular Injury	Development of glomerular cyst	0.052	LGMN	1
Renal Inflammation,Renal Nephritis	Inflammation of renal interstitium	0.052	HGF	1
Cardiac Inflammation	Atrial endocarditis	0.052	TGFB1	1
Cardiac Dilation,Cardiac Enlargement	Dilated cardiomyopathy type 1AA	0.052	ACTN2	1
Liver Hyperplasia/Hyperproliferation	Poorly differentiated liver cholangiocarcinoma	0.052	CDH2	1
Cardiac Dilation,Cardiac Enlargement	Dilated cardiomyopathy type 1JJ	0.052	LAMA4	1
Cardiac Hyperplasia/Hyperproliferation	Familial atrial myxoma	0.052	PRKAR1A	1
Cardiac Dysplasia	Dysplasia of right ventricle	0.052	RPSA	1
Liver Inflammation/Hepatitis	Chronic active hepatitis C	0.052	TGFB1	1
Congenital Heart Anomaly	Short stature, developmental delay and congenital heart defect	0.052	TKT	1
Cardiac Enlargement	Hypertrophy of ventricular myocytes	0.055	AGT,FSTL3,IGF1,INHBA,TXN	5
Liver Steatosis	Microvesicular hepatic steatosis	0.0604	ACAA2,CTHRC1,FSTL3,HSD17B4,LDLR,SOD1	6
Liver Hyperplasia/Hyperproliferation	Unresectable liver metastasis	0.0614	EGFR,TOP1	2
Cardiac Inflammation	Inflammatory cardiomyopathy	0.0614	HPRT1,IMPDH2	2
Liver Fibrosis	Mitogenesis of hepatic stellate cells	0.0614	AGT,F2	2
Renal Proliferation	Proliferation of renal tubular epithelial cells	0.0614	AGT,TGFB1	2
Renal Necrosis/Cell Death	Anoikis of kidney cell lines	0.0614	CTNNB1,VTN	2
Increased Levels of Creatinine	Increased clearance of creatinine	0.0638	ACE,AGT,ARHGDIA	3
Glomerular Injury,Renal Fibrosis	Fibrosis of renal glomerulus	0.0638	CLU,COL4A3,CTSK	3
Cardiac Enlargement	Right ventricular hypertrophy	0.0654	APOE,CXCL12,GAA,IL6,MYLK3	5
Cardiac Arrythmia	Atrial flutter	0.0667	ACE,F10,F2,F9,TUBA1C,TUBB,TUBB3	7
Pulmonary Hypertension	Pulmonary hypertensive arterial disease	0.0723	APOE,ENG,FHL1,PDGFRA,PDGFRB,PPIA,SERPINE1,TGFB1,TNFAIP6	9
Cardiac Inflammation	Inflammation of myocardium	0.0762	AGT,APOA1	2
Liver Cirrhosis,Liver Fibrosis	Early stage primary biliary cirrhosis	0.0762	APOB,LDLR	2
Renal Atrophy	Atrophy of renal medulla	0.0762	ADAMTS1,AGT	2
Liver Fibrosis	Chemotaxis of hepatic stellate cells	0.0762	CCL2,MAPK1	2
Glomerular Injury,Renal Inflammation,Renal Nephritis	Alport syndrome	0.0762	COL4A3,FN1	2
Liver Hyperplasia/Hyperproliferation	Hyperplasia of liver cells	0.0762	C3,KITLG	2
Cardiac Arrythmia	Brugada syndrome type 1	0.0824	COL5A1,FBN1,LAMA4,TTR	4
Renal Inflammation,Renal Nephritis	Interstitial nephritis	0.0824	ACE,AGT,ALB,ARHGDIA	4
Congenital Heart Anomaly	Congenital anomaly of aortic arch	0.0827	FLNA,LTBP1,NRP1	3
Liver Inflammation/Hepatitis,Liver Steatosis	Steatohepatitis	0.0864	ADIPOQ,AHNAK,AHSA1,APOB,EIF4A3,HNRNPU,IL6,LGALS3,SOD1,SOD2,TKT	11
Kidney Failure	Acute renal failure	0.0877	ACE,ALB,CCN1,GSS,GSTP1,HEXB,HMOX1,PPIA,PPP3CA	9
Pulmonary Hypertension	Pulmonary Hypertension	0.09	APOE,CA12,CCL2,ENG,FHL1,IL1RN,MESD,MIF,MME,PDGFRA,PDGFRB,PLG,PPIA,SERPINE1,TGFB1,TNFAIP6	16
Congenital Heart Anomaly	Single ventricle defect	0.0901	FLNA,TUBA1C,TUBB,TUBB3	4
Cardiac Inflammation	Experimental autoimmune myocarditis	0.0929	CCL2,MMP2,MMP9	3
Cardiac Damage,Cardiac Degeneration	Degeneration of cardiomyocytes	0.0929	LAMA4,MAPK1,TXN	3
Liver Hypoplasia	Liver Hypoplasia	0.0958	ARHGAP1,CTHRC1,HGF,SPTBN1,YBX1	5
Liver Cholestasis	Progressive familial intrahepatic cholestasis type 1	0.0964	AKR1C3,BLVRA,HPX,LIPA,LPA,UGP2	6
Hepatocellular carcinoma,Liver Hyperplasia/Hyperproliferation	BCLC stage B hepatocellular carcinoma	0.0982	CA12,PDGFRA,PDGFRB,TXNRD1	4
Liver Hyperplasia/Hyperproliferation	Hepatocellular adenoma	0.0982	CTNNB1,FAH,GLUL,IL6ST	4
Liver Cholestasis	Intrahepatic cholestasis	0.101	AKR1C3,BLVRA,C3,CTNNB1,HPX,LIPA,LPA,UGP2	8
Cardiac Arrythmia	Familial arrhythmogenic right ventricular dysplasia type 8	0.101	TUBB3	1
Congestion of liver	Congestion of liver	0.101	ENG	1
Renal Damage,Renal Tubule Injury	Injury of proximal tubule cells	0.101	CAT	1
Glomerular Injury,Renal Inflammation,Renal Nephritis	Autosomal recessive Alport syndrome	0.101	COL4A3	1
Cardiac Arrythmia	Arrhythmogenic right ventricular dysplasia familial 10	0.101	PRKAR1A	1
Renal Degeneration	Degeneration of renal tubular epithelial cells	0.101	ARHGDIA	1
Increased Levels of LDH	Increased localization of LDH	0.101	C5	1
Increased Levels of CRP	Increased synthesis of CRP	0.101	IL6	1
Decreased Levels of Albumin	Decreased production of albumin	0.101	IL6	1
Liver Inflammation/Hepatitis	Chronic persistent hepatitis	0.101	THOP1	1
Heart Failure	Experimentally-induced heart failure	0.101	PEBP1	1
Renal Depletion	Depletion of podocytes	0.101	TGFB1	1
Cardiac Inflammation	Lymphocytic myocarditis	0.101	IMPDH2	1
Cardiac Necrosis/Cell Death	Necrosis of left ventricle	0.101	AGT	1
Liver Regeneration	Initiation of regeneration of liver	0.101	IL6	1
Liver Proliferation	Delay in initiation of proliferation of hepatocytes	0.101	CTNNB1	1
Liver Hyperplasia/Hyperproliferation	Onset of development of liver tumor	0.101	CTNNB1	1
Renal Damage	Drug toxicity-related nephropathy	0.101	GSS	1
Cardiac Enlargement	Hypertrophy of ventricular septum	0.101	MYL9	1
Cardiac Dilation,Cardiac Enlargement	Dilated cardiomyopathy 1y	0.101	TPM1	1
Glomerular Injury,Renal Fibrosis	Severe renal fibrosis	0.101	TGFB1	1
Cardiac Dilation	Dilation of right ventricle	0.101	SERPINF2	1
Liver Fibrosis	Hepatic bridging fibrosis	0.101	IL6	1
Liver Fibrosis	Severe hepatic fibrosis	0.101	COL3A1	1
Liver Necrosis/Cell Death	Delay in cell death of hepatocytes	0.101	FAS	1
Cardiac Enlargement	Hypertrophy of ventricular myocardium	0.101	IL6	1
Glomerular Injury	Sclerosis of renal glomerulus	0.101	AGT	1
Pulmonary Hypertension	Hereditary hemorrhagic telangiectasia-related pulmonary arterial hypertension	0.101	ENG	1
Cardiac Enlargement	Transverse aortic constriction-induced cardiac hypertrophy	0.101	MME	1
Cardiac Pulmonary Embolism	Acute submassive pulmonary embolism	0.101	PLG	1
Liver Fibrosis	Progressive hepatic fibrosis	0.101	TGFB1	1
Liver Damage	Acetaminophen overdose	0.101	GSS	1
Renal Enlargement	Hypertrophy of proximal tubule cells	0.101	AGT	1
Cardiac Infarction	Type 1 myocardial infarction	0.101	APOA1	1
Glomerular Injury	Lipidosis of renal glomerulus	0.101	APOE	1
Liver Proliferation	Proliferation of hepatic progenitor cells	0.101	INHBA	1
Congenital Heart Anomaly	Cardioacrofacial dysplasia	0.101	PRKACA	1
Renal Regeneration	Regeneration of glomerular capillary	0.101	THY1	1
Liver Fibrosis	Biliary fibrosis	0.101	IL6	1
Heart Failure	Aborted sudden cardiac death	0.101	VCL	1
Cardiac Infarction	Stage II acute myocardial infarction	0.101	C4A/C4B	1
Cardiac Enlargement	Enlargement of cardiac valve	0.101	ADAM17	1
Glomerular Injury	Loss of mesangial cells	0.101	PDGFRB	1
Increased Levels of Bilirubin	Increased excretion of bilirubin	0.101	RDX	1
Renal Damage,Renal Tubule Injury	Injury of renal tubular epithelial cells	0.101	RGMB	1
Kidney Failure	Gentamicin-induced renal injury	0.101	HEXB	1
Liver Hyperplasia/Hyperproliferation	Unresectable liver cholangiocarcinoma	0.107	HSP90AA1,HSP90AB1,HSP90B1,PDGFRB	4
Increased Levels of ALT	Increased activation of ALT	0.109	C3,PLG	2
Cardiac Arteriopathy	Vasospasm of coronary artery	0.109	AGT,SOD1	2
Glomerular Injury	Cortical renal glomerulopathies	0.109	ACTN4,CLU	2
Congenital Heart Anomaly	Transposition of great vessels	0.115	HSPG2,NRP1,TGFBR3	3
Cardiac Arrythmia	Persistent atrial fibrillation	0.115	F10,F2,PPP1CA,SERPINC1	4
Liver Inflammation/Hepatitis,Liver Steatosis	Nonalcoholic steatohepatitis	0.116	ADIPOQ,AHNAK,AHSA1,APOB,EIF4A3,HNRNPU,LGALS3,TKT	8
Liver Necrosis/Cell Death	Cell death of liver cell lines	0.117	FAS,HGF,SERPINA3,TGFB1,TIMP1	5
Heart Failure	Chronic heart failure	0.124	ACE,CA12,CXCL12,MME,TF	5
Cardiac Dysfunction	Dysfunction of cardiomyocytes	0.126	DPP4,ENPP2	2
Heart Failure	Ischemic heart failure	0.126	PPP2R1A,PTPA	2
Liver Damage	Damage of hepatocytes	0.126	BPNT1,IL1RN,MIF	3
Congenital Heart Anomaly	Conotruncal heart malformations	0.134	FBLN1,FLNA,HSPG2,LTBP1,NRP1,TGFBR3,TLL1	7
Nephrosis	Monogenic nephrotic syndrome	0.138	ARHGDIA,FAT1,LAMB2	3
Hepatocellular carcinoma,Liver Hyperplasia/Hyperproliferation	BCLC stage C hepatocellular carcinoma	0.143	AXL,PDGFRA,PDGFRB,TXNRD1	4
Cardiac Arrythmia	Paroxysmal familial ventricular fibrillation	0.144	LMNA,VCL	2
Cardiac Arrythmia	Arrhythmogenic right ventricular dysplasia familial 9	0.144	DES,LMNA	2
Glomerular Injury	Familial focal segmental glomerulosclerosisrosis	0.144	ACTN4,APOL1	2
Cardiac Arteriopathy	Cardiac allograft vasculopathy	0.148	PCSK9	1
Cardiac Arrythmia	Brugada syndrome type 9	0.148	LAMA4	1
Renal Dilation	Vasodilation of renal artery	0.148	MMP9	1
Cardiac Fibrosis,Glomerular Injury,Renal Fibrosis	Perivascular fibrosis of kidney	0.148	AGT	1
Cardiac Damage	Rupture of myocardium	0.148	SERPINE1	1
Liver Inflammation/Hepatitis	Inflammation of liver portal space	0.148	SPARC	1
Cardiac Regeneration	Regeneration of myocardium	0.148	HMGB1	1
Glomerular Injury,Renal Inflammation,Renal Nephritis	Active proliferative lupus nephritis	0.148	IMPDH2	1
Cardiac Transformation	Transformation of cardiac fibroblasts	0.148	TGFB1	1
Glomerular Injury	Size of glomerular crescent	0.148	PLG	1
Degeneration of liver	Degeneration of hepatocytes	0.148	XRCC5	1
Liver Proliferation	Arrest in growth of hepatocytes	0.148	TGFB1	1
Liver Proliferation	Expansion of hepatic progenitor cells	0.148	CUL3	1
Liver Steatosis	Advanced stage hepatic steatosis	0.148	CD44	1
Glomerular Injury,Kidney Failure,Renal Fibrosis	Tubulo-interstitial fibrosis of skeletal muscle	0.148	MMP14	1
Congenital Heart Anomaly	Interauricular communication	0.148	MYLK	1
Cardiac Dilation,Cardiac Dysfunction,Cardiac Enlargement	Dilated cardiomyopathy with left ventricular noncompaction	0.148	VCL	1
Liver Cholestasis	Secretion of taurocholic acid	0.148	HMOX1	1
Liver Hyperplasia/Hyperproliferation	Formation of liver cavernous hemangioma	0.148	MAPK1	1
Cardiac Dilation,Cardiac Enlargement	Dilated cardiomyopathy secondary to drug	0.148	ACE	1
Heart Failure	Chronic New York Heart Association class II-IV chronic heart failure	0.148	MME	1
Glomerular Injury,Renal Fibrosis	Fibrosis of tubulointerstitium	0.148	COL4A3	1
Glomerular Injury	Focal segmental glomerulosclerosis 1	0.148	ACTN4	1
Cardiac Inflammation	Exacerbated acute rheumatic carditis	0.148	ANXA1	1
Renal Degeneration	Degeneration of nephron	0.148	TGFB1	1
Glomerular Injury,Renal Inflammation,Renal Nephritis	Thin basement membrane disease	0.148	COL4A3	1
Cardiac Enlargement	Hypertrophy of coronary artery	0.148	AGT	1
Kidney Failure	Progressive myoclonic epilepsy type 4 with renal failure	0.148	GBA1	1
Glomerular Injury,Renal Hypoplasia	Hypoplasia of mesangial cells	0.148	ARHGDIA	1
Congenital Heart Anomaly	Double inlet heart left ventricle	0.148	TLL1	1
Renal Enlargement	Hypertrophy of podocytes	0.148	AGT	1
Cardiac Damage	Anthracycline-induced cardiotoxicity	0.148	ACE	1
Cardiac Arteriopathy	Susceptibility to coronary artery disease	0.148	PON1	1
Liver Inflammation/Hepatitis	Chronic hepatitis B	0.149	CSF1,HSP90B1,IL6,IMPDH2,TGFB1,TIMP1	6
Renal Dysplasia	Dysplasia of kidney	0.151	ACE,AGT,CLU	3
Liver Hyperplasia/Hyperproliferation	Symptomatic stage iodine-refractory liver metastasis	0.163	PDGFRA,PDGFRB	2
Liver Cirrhosis,Liver Fibrosis	Alcoholic cirrhosis	0.163	CHI3L1,TGFB1	2
Hepatocellular carcinoma,Liver Hyperplasia/Hyperproliferation	Child-Pugh class A primary hepatocellular carcinoma	0.163	PDGFRA,PDGFRB	2
Hepatocellular carcinoma,Liver Hyperplasia/Hyperproliferation	Child-Pugh class A advanced hepatocellular carcinoma	0.163	AXL,PDGFRA,PDGFRB	3
Liver Proliferation	Quantity of hepatocytes	0.176	CTNNB1,MDK,PROS1	3
Cardiac Dysfunction,Heart Failure	Systolic heart failure	0.176	ACE,MME,TF	3
Heart Failure	Acute heart failure	0.179	AGT,CA12,F10,F9,MME,VCL	6
Cardiac Regeneration	Regeneration of heart	0.182	AGRN,HMGB1	2
Congenital Heart Anomaly	Familial atrial septal defect	0.182	TLL1,TPM1	2
Liver Proliferation	Proliferation of oval cells	0.182	CXCL12,TGFB1	2
Hepatocellular carcinoma,Liver Hyperplasia/Hyperproliferation	Invasive hepatocellular carcinoma	0.182	PDGFRA,PDGFRB	2
Glomerular Injury,Renal Inflammation,Renal Nephritis	Diffuse proliferative lupus nephritis	0.182	ACTN4,IMPDH2	2
Congenital Heart Anomaly	Interrupted aortic arch	0.182	FLNA,LTBP1	2
Hepatocellular carcinoma,Liver Hyperplasia/Hyperproliferation	BCLC stage B advanced hepatocellular carcinoma	0.182	PDGFRA,PDGFRB	2
Liver Necrosis/Cell Death	Apoptosis of liver cell lines	0.183	FAS,HGF,TGFB1,TIMP1	4
Hepatocellular carcinoma,Liver Hyperplasia/Hyperproliferation	Metastasis of hepatocellular carcinoma	0.192	SULF2	1
Liver Inflammation/Hepatitis	Hepatitis subtype infantile hepatitis syndrome	0.192	IL6	1
Liver Hyperplasia/Hyperproliferation	Inflammatory hepatocellular adenoma	0.192	IL6ST	1
Glomerular Injury,Renal Inflammation,Renal Nephritis	Autosomal dominant Alport syndrome	0.192	COL4A3	1
Glomerular Injury,Renal Inflammation,Renal Nephritis	Type I Alport syndrome	0.192	FN1	1
Liver Hyperplasia/Hyperproliferation	Focal nodular hyperplasia	0.192	CDH2	1
Liver Inflammation/Hepatitis	Infantile cholestatic hepatitis syndrome	0.192	IL6	1
Liver Inflammation/Hepatitis,Liver Necrosis/Cell Death	Necrotizing inflammation of liver	0.192	APOE	1
Cardiac Inflammation	Postmyocardial infarction syndrome	0.192	MME	1
Liver Steatosis	Alcoholic fatty liver disease	0.192	ADIPOQ	1
Liver Inflammation/Hepatitis	Acute hepatitis B	0.192	CSF1	1
Liver Necrosis/Cell Death	Focal necrosis of liver cells	0.192	APOE	1
Heart Failure	Stable disease stage heart failure	0.192	MME	1
Renal Hypoplasia	Hypoplasia of renal medulla	0.192	ACE	1
Liver Cholestasis	Obstruction of bile duct	0.192	HGF	1
Heart Failure	New York Heart Association class II heart failure	0.192	MME	1
Cardiac Dysfunction,Heart Failure	Symptomatic stage chronic systolic heart failure	0.192	MME	1
Liver Hyperplasia/Hyperproliferation	Growth of hepatoblastoma	0.192	CTNNB1	1
Liver Inflammation/Hepatitis	Chronic active type B viral hepatitis	0.192	TGFB1	1
Heart Failure	Onset of heart failure	0.192	TIMP3	1
Liver Inflammation/Hepatitis	Hepatitis A	0.192	CSF1	1
Congenital Heart Anomaly	Familial congenital heart disease	0.196	CALM1 (includes others),CDH2,COL1A2,FBLN1,FLNA,HSPG2,LTBP1,NRP1,TGFBR3,TKT,TLL1,TPM1	12
Liver Regeneration	Regeneration of liver cells	0.201	IL6,MMP9	2
Cardiac Hypoplasia	Hypoplasia of myocardium	0.201	IL6ST,NAE1	2
Cardiac Arrythmia,Tachycardia	Ventricular tachycardia	0.209	ASPH,CALM1 (includes others),KITLG,LAMA4,LMNA,TPM1,VCL	7
Cardiac Dilation,Cardiac Enlargement	Dilated cardiomyopathy 1A	0.217	ACTN2,DES,LMNA	3
Cardiac Dysfunction	Left ventricular systolic dysfunction	0.22	DPP4,FSTL3	2
Nephrosis	Familial nephrotic syndrome	0.224	ARHGDIA,COL4A3,FAT1,ITGA2,ITGB1,LAMA5,LAMB2	7
Cardiac Arrythmia	Catecholaminergic polymorphic ventricular tachycardia or long QT syndrome	0.229	CALM1 (includes others),LAMA4,LMNA,TPM1,VCL	5
Hepatocellular carcinoma,Liver Hyperplasia/Hyperproliferation	Differentiated hepatocellular carcinoma	0.234	GLUL	1
Liver Inflammation/Hepatitis	Chronic hepatitis D	0.234	FNTA	1
Increased Levels of Red Blood Cells	Increased production of red blood cells	0.234	KITLG	1
Liver Inflammation/Hepatitis	Chronic phase hepatitis C	0.234	IMPDH2	1
Liver Inflammation/Hepatitis	Relapsed chronic hepatitis C	0.234	IMPDH2	1
Liver Inflammation/Hepatitis	Chronic hepatitis C genotype 1	0.234	IMPDH2	1
Heart Failure	New York Heart Association class III heart failure	0.234	MME	1
Liver Damage	Histopathological change of liver	0.234	APP	1
Renal Necrosis/Cell Death	Necroptosis of kidney cell lines	0.234	RGMB	1
Glomerular Injury,Renal Inflammation,Renal Nephritis	Experimental crescentic glomerulonephritis	0.234	IL1RN	1
Liver Proliferation	Proliferation of liver	0.234	TKT	1
Liver Necrosis/Cell Death	Quantity of apoptotic hepatocytes	0.234	TGFB1	1
Glomerular Injury,Renal Thrombosis	Thrombosis of glomerular capillary	0.234	APOE	1
Cardiac Enlargement	Myocardial hypertrophy	0.234	AGT	1
Cardiac Arteriopathy	Stable coronary artery disease	0.234	ACE	1
Congenital Heart Anomaly	Atrial septal defect type 1	0.234	TPM1	1
Cardiac Arrythmia	Permanent atrial fibrillation	0.24	F10,F9	2
Liver Hyperplasia/Hyperproliferation	Progressive liver metastasis	0.24	PDGFRA,PDGFRB	2
Glutathione Depletion In Liver	Quantity of glutathione in liver	0.245	CTH,IL6,TGFB1	3
Congenital Heart Anomaly	Tetralogy of Fallot	0.26	ACTN2,TPM1	2
Liver Hyperplasia/Hyperproliferation	Ann Arbor stage I-IV hepatosplenic T-cell lymphoma	0.26	TUBA1C,TUBB3	2
Glomerular Injury,Renal Inflammation,Renal Nephritis	Primary glomerulonephritis	0.26	FKBP1A,PPP3CA	2
Cardiac Arrythmia,Tachycardia	Tachycardia	0.269	AGT,ASPH,CALM1 (includes others),KITLG,LAMA4,LMNA,TPM1,VCL,VWF	9
Hepatocellular carcinoma,Liver Hyperplasia/Hyperproliferation	Child-Pugh class A hepatocellular carcinoma	0.273	AXL,CA12,PDGFRA,PDGFRB	4
Biliary Hyperplasia	Proliferation of cholangiocytes	0.273	IL6,KITLG,TGFB1	3
Congenital Heart Anomaly	Persistent truncus arteriosus	0.273	FLNA,LTBP1,NRP1	3
Cardiac Dysfunction,Cardiac Fibrosis	Perivascular fibrosis of left ventricle	0.274	GAS6	1
Decreased Levels of Albumin	Increased uptake of albumin	0.274	FLNA	1
Liver Fibrosis	Periportal fibrosis	0.274	NAMPT	1
Renal Proliferation	Cytostasis of kidney cell lines	0.274	TGFB1	1
Congenital Heart Anomaly	Common atrium	0.274	LTBP1	1
Cardiac Necrosis/Cell Death	Necrosis of myocardium	0.274	DES	1
Liver Cirrhosis,Liver Failure,Liver Fibrosis	Acute-on-chronic liver failure	0.274	ALB	1
Renal Proliferation	Arrest in growth of kidney cell lines	0.274	LMNA	1
Liver Inflammation/Hepatitis	Infection by Hepatitis C virus genotype 4	0.274	IMPDH2	1
Congenital Heart Anomaly	Double aortic arch	0.274	NRP1	1
Increased Levels of LDH	Increased activation of LDH	0.279	CFD,LDHA	2
Cardiac Dysfunction	Diastolic dysfunction of heart	0.279	ANXA1,TIMP1	2
Hepatocellular carcinoma,Liver Hyperplasia/Hyperproliferation	Child-Pugh class A metastatic hepatocellular carcinoma	0.279	PDGFRA,PDGFRB	2
Heart Failure	Cardiac death	0.279	ACE,VCL	2
Liver Hematopoiesis	Hematopoiesis of liver	0.299	CIAPIN1,FH	2
Glutathione Depletion In Liver	Conjugation of glutathione	0.299	GSTP1,MIF	2
Hepatocellular carcinoma,Liver Hyperplasia/Hyperproliferation	BCLC stage C advanced hepatocellular carcinoma	0.299	PDGFRA,PDGFRB	2
Cardiac Dysfunction	Remodeling of left ventricle	0.299	FAS,KITLG	2
Hepatocellular carcinoma,Liver Hyperplasia/Hyperproliferation	Locally advanced hepatocellular carcinoma	0.299	PDGFRA,PDGFRB	2
Increased Levels of LDH	Increased Levels of LDH	0.299	APP,C5,CFD,HMOX1,LDHA	5
Hepatocellular carcinoma,Liver Hyperplasia/Hyperproliferation	Progressive hepatocellular carcinoma	0.302	AXL,PDGFRA,PDGFRB	3
Cardiac Dysfunction	Diastolic dysfunction	0.308	ANXA1,CCN2,DPP3,TIMP1	4
Heart Failure	Severe chronic heart failure	0.312	CXCL12	1
Liver Inflammation/Hepatitis	Chronic hepatitis C virus genotype 4	0.312	IMPDH2	1
Glomerular Injury,Renal Fibrosis	Progressive renal fibrosis	0.312	TGFB1	1
Liver Cholestasis	Obstructive jaundice	0.312	CAT	1
Increased Levels of Potassium	Increased efflux of K+	0.312	MAPK1	1
Cardiac Arrythmia	Arrhythmia of heart ventricle	0.325	ACTN2,ASPH,CALM1 (includes others),KITLG,LAMA4,LMNA,TPM1,VCL	8
Hepatocellular carcinoma,Liver Hyperplasia/Hyperproliferation	Quantity of hepatocellular carcinoma	0.338	CCN1,SULF2	2
Glomerular Injury,Renal Inflammation,Renal Nephritis	Systemic lupus erythematosus nephritis	0.345	IMPDH2,LTBP1,S100A10	3
Liver Inflammation/Hepatitis	HIV-HCV co-infection	0.348	ALB	1
Cardiac Dysfunction	Familial isolated autosomal dominant noncompaction of left ventricular myocardium	0.348	ACTN2	1
Nephrosis	Idiopathic nephrosis	0.348	IMPDH2	1
Liver Cirrhosis,Liver Fibrosis	Hepatitis C virus-related liver cirrhosis	0.348	CHI3L1	1
Glomerular Injury,Renal Inflammation,Renal Nephritis	Systemic lupus erythematosus nephritis class V	0.348	IMPDH2	1
Increased Levels of AST	Increased localization of AST	0.357	APOE,FAS	2
Pulmonary Hypertension	Primary pulmonary hypertension	0.374	ENG,FHL1,TNFAIP6	3
Cardiac Arrythmia	Familial arrhythmogenic right ventricular dysplasia type 1	0.382	PLEC	1
Liver Regeneration	Regeneration of hepatocytes	0.382	MMP9	1
Pulmonary Hypertension	Primary pulmonary hypertension 1	0.382	ENG	1
Cardiac Dysfunction,Heart Failure	Diastolic heart failure	0.382	CCN2	1
Glomerular Injury,Renal Inflammation,Renal Nephritis	Systemic lupus erythematosus nephritis class III	0.382	IMPDH2	1
Glutathione Depletion In Liver,Liver Fibrosis	Quantity of reactive oxygen species in liver	0.382	PXDN	1
Cardiac Necrosis/Cell Death	Apoptosis of cardiac fibroblasts	0.382	AGT	1
Liver Cirrhosis,Liver Fibrosis	Hepatitis B virus-related liver cirrhosis	0.382	CHI3L1	1
Liver Inflammation/Hepatitis	Chronic infection by Hepatitis C virus genotype 1	0.382	IMPDH2	1
Congenital Heart Anomaly	Perimembranous ventricular septal defect	0.395	CXCL12,LTBP1	2
Liver Hyperplasia/Hyperproliferation	Proliferation of liver cancer cells	0.395	S100A6,TGFB1	2
Renal Hypoplasia	Agenesis of kidney	0.403	GFRA1,LAMC1,SLIT3	3
Cardiac Infarction	Nonfatal myocardial infarction	0.413	ACE,NNMT	2
Cardiac Stenosis	Stenosis of pulmonary valve	0.414	MYH11	1
Liver Inflammation/Hepatitis	Fulminant hepatitis	0.414	FAS	1
Renal Inflammation,Renal Nephritis	Nephrotoxic nephritis	0.414	PARP1	1
Hepatocellular carcinoma,Liver Hyperplasia/Hyperproliferation	BCLC stage C primary hepatocellular carcinoma	0.414	PDGFRB	1
Hepatocellular carcinoma,Liver Hyperplasia/Hyperproliferation	Local hepatocellular carcinoma	0.414	PDGFRB	1
Glutathione Depletion In Liver,Liver Fibrosis	Generation of reactive oxygen species in liver	0.414	TGFB1	1
Pulmonary Hypertension	Pulmonary arterial hypertension associated with congenital heart disease	0.414	ENG	1
Hepatocellular carcinoma,Liver Hyperplasia/Hyperproliferation	BCLC stage B primary hepatocellular carcinoma	0.414	PDGFRB	1
Heart Failure	End stage heart failure	0.414	PARK7	1
Kidney Failure	Stage V chronic kidney disease	0.444	PCSK9	1
Liver Fibrosis	Experimentally-induced hepatic fibrosis	0.444	LGALS3	1
Bradycardia,Cardiac Arrythmia	Sinus bradycardia	0.444	CALR	1
Hepatocellular carcinoma,Liver Hyperplasia/Hyperproliferation	Inoperable hepatocellular carcinoma	0.444	PDGFRB	1
Cardiac Dysfunction	Left ventricular diastolic dysfunction	0.444	TIMP1	1
Congenital Heart Anomaly	Primum atrial septal defect	0.444	TLL1	1
Liver Damage	Reperfusion injury of liver	0.444	HMOX1	1
Hepatocellular carcinoma,Liver Hyperplasia/Hyperproliferation	Intermediate disease stage hepatocellular carcinoma	0.444	PDGFRB	1
Liver Damage	Hepatotoxicity	0.445	FAS,GSS,SERPINA1	3
Congenital Heart Anomaly	Atrioventricular septal defect	0.449	ELN,TLL1	2
Liver Hyperplasia/Hyperproliferation	Progressive metastatic intrahepatic cholangiocarcinoma	0.467	EGFR,PDGFRB	2
Kidney Failure,Renal Damage	Ischemic acute renal failure	0.473	HMOX1	1
Cardiac Arrythmia,Congenital Heart Anomaly	Long QT syndrome 1	0.473	CALM1 (includes others)	1
Glomerular Injury,Renal Inflammation,Renal Nephritis	Lupus nephritis WHO class III/IV	0.473	IMPDH2	1
Increased Levels of ALT	Increased release of ALT	0.473	IL6	1
Cardiac Hyperplasia/Hyperproliferation	Hyperplasia of heart	0.473	IGF2R	1
Liver Hematopoiesis	Erythropoiesis of liver	0.473	FH	1
Cardiac Arrythmia	Paroxysmal familial ventricular fibrillation type 1	0.473	VCL	1
Congenital Heart Anomaly	Congenital malformation of heart	0.501	MYH9	1
Increased Levels of Albumin	Increased localization of albumin	0.501	B2M	1
Hepatocellular carcinoma,Liver Hyperplasia/Hyperproliferation	Child-Pugh class B advanced hepatocellular carcinoma	0.501	PDGFRA	1
Hepatocellular carcinoma,Liver Hyperplasia/Hyperproliferation	Growth of hepatocellular carcinoma	0.501	EHD2,IL6	2
Congenital Heart Anomaly	Failure of heart looping	0.501	ENG,POFUT1	2
Renal Inflammation,Renal Nephritis	Pyelonephritis	0.527	IL6	1
Cardiac Dysfunction,Congenital Heart Anomaly	Bicuspid aortic valve	0.551	MYH11	1
Cardiac Arrythmia	Familial atrial fibrillation	0.597	LAMA4	1
Liver Fibrosis	Carbon tetrachloride-induced liver fibrosis	0.638	UBE2K	1
Congenital Heart Anomaly	Situs inversus totalis	1	MGAT1	1
Decreased Levels of Potassium	Decreased Levels of Potassium	1	AGT	1
Increased Levels of LDH	Increased release of LDH	1	APP,HMOX1	2
Cardiac Arrythmia	Ventricular fibrillation	1	ACTN2,LMNA,VCL	3
Bradycardia,Cardiac Arrythmia	Bradycardia	1	AGT,CALR,NRDC	3
Heart Failure	Heart failure with preserved ejection fraction	1	MME	1
Kidney Failure,Liver Failure	Hepatorenal syndrome	1	ALB	1
Congenital Heart Anomaly	Double outlet right ventricle	1	FBLN1,TLL1	2
Congenital Heart Anomaly	Syndromic congenital heart disease	1	COL1A2,PRKACA	2
Heart Failure	Acute decompensated heart failure	1	AGT	1
Cardiac Arrythmia	Long-QT syndrome	1	CALM1 (includes others),VCL	2
Heart Failure	Cardiorenal syndrome	1	CA12	1
Liver Inflammation/Hepatitis	Experimental hepatitis	1	FAS	1
Congenital Heart Anomaly	Familial cardiac septal defect	1	FBLN1,TLL1,TPM1	3
